# 1 Rostrocaudal Patterning and Neural Crest Differentiation of Human Pre- 2 Neural Spinal Cord Progenitors *in vitro*

3

4 Fay Cooper<sup>1,\*</sup>, George E Gentsch<sup>1</sup>, Richard Mitter<sup>2</sup>, Camille Bouissou<sup>1</sup>, Lyn Healy<sup>3</sup>, Ana  
5 Hernandez-Rodriguez<sup>1</sup>, James C Smith<sup>1</sup> and Andreia S Bernardo<sup>1,4</sup>

6

7 <sup>1</sup>Developmental Biology Laboratory, The Francis Crick Institute, 1 Midland Road, London, NW1 1AT, UK

8 <sup>2</sup>Bioinformatics & Biostatistics Core Facility, The Francis Crick Institute, 1 Midland Road, London, NW1 1AT, UK

9 <sup>3</sup>Human Embryo and Stem Cell Unit, The Francis Crick Institute, 1 Midland Road, London, NW1 1AT, UK

10 <sup>4</sup>National Heart and Lung Institute, Imperial College London, UK

11

12 \*Corresponding author

13

## 14 **ABSTRACT**

15 The spinal cord emerges from a niche of neuromesodermal progenitors (NMPs) formed and  
16 maintained by Wnt/FGF signals in the posterior end of the embryo. NMPs can be generated from  
17 human pluripotent stem cells and hold promise for spinal cord replacement therapies. However,  
18 NMPs are transient and unable to produce the full range of rostrocaudal spinal cord identities *in vitro*.  
19 Here we report the generation of NMP-derived pre-neural progenitors (PNPs) with stem cell-like self-  
20 renewal capacity. PNPs maintain pre-spinal cord identity by co-expressing the transcription factors  
21 SOX2 and CDX2, and they lose the mesodermal potential by downregulating TBXT. Over 10 passages  
22 these cells divide to self-renew and to make trunk neural crest, while gradually adopting a more  
23 posterior identity by activating colinear *HOX* gene expression. Rostrocaudal identity can be prolonged  
24 in a thoracic identity for up to 15 passages by modulating TGF- $\beta$ , and PNPs can be ventralised by  
25 Hedgehog signalling.

26

## 27 **INTRODUCTION**

28 Neural stem cells (NSCs) are a useful *in vitro* tool for understanding neural development and disease,  
29 and they have great potential for use in regenerative medicine (Snyder, 2017). However, for use in  
30 cell replacement therapy, it is important that NSCs adopt the correct region-specific identities and  
31 adapt properly to their local microenvironments (Kadoya et al., 2016; Kumamaru et al., 2018; Nagoshi,  
32 Tsuji, Nakamura, & Okano, 2019). This requirement for specific neural subtypes is illustrated by  
33 patients with motor neuron disease or spinal cord injuries, who often have lesions in specific neuronal  
34 cell types and whose treatment depends on developing protocols that cause induced pluripotent stem

35 cells (iPSCs) to differentiate into the right neural subtypes (Nijssen, Comley, & Hedlund, 2017;  
36 Trawczynski, Liu, David, & Fessler, 2019).

37

38 The development of these protocols will be informed by our understanding of neurogenesis. Forebrain  
39 and midbrain develop from the anterior neural plate, a naïve tissue neuralised by the underlying axial  
40 mesoderm through the release of TGF- $\beta$  inhibitors (Cajal et al., 2012; Mathis & Nicolas, 2000). Spinal  
41 cord arises from a progenitor pool of neuromesodermal progenitors (NMPs) that reside in the caudal  
42 lateral epiblast/node streak border and later the chordoneural hinge (Wilson, Olivera-Martinez, &  
43 Storey, 2009). NMPs are bi-potent and give rise to both the posterior neural tube and adjacent somite-  
44 forming paraxial mesoderm (Brown & Storey, 2000; Cambray & Wilson, 2002, 2007; Delfino-Machin,  
45 Lunn, Breitkreuz, Akai, & Storey, 2005; Tzouanacou, Wegener, Wymeersch, Wilson, & Nicolas, 2009).  
46 NMPs are maintained by the synergistic action of FGF and Wnt signals which activate the co-  
47 expression of the transcription factors TBXT, SOX2 and CDX2. TBXT and SOX2 are mutually antagonistic  
48 cell fate determinants for the mesodermal and neuroectodermal germ layers, respectively (Gouti et  
49 al., 2017; Henrique, Abranches, Verrier, & Storey, 2015; Koch et al., 2017; Tsakiridis et al., 2014;  
50 Wymeersch et al., 2016). CDX2 conveys increasingly more posterior identity to NMP descendants by  
51 inducing colinear *HOX(1-13)* gene expression during axial elongation (Amin et al., 2016; Neijts, Amin,  
52 van Rooijen, & Deschamps, 2017; van de Ven et al., 2011; van den Akker et al., 2002). The human HOX  
53 genes are expressed in a spatial and temporal order that is colinear with their physical 3' to 5' genomic  
54 position, and assign overlapping regional identity to the brain and vertebral segments of the spinal  
55 cord: HOX1-5, hindbrain; HOX4-6, cervical; HOX6-9, thoracic and HOX10-13, lumbosacral (Philippidou  
56 & Dasen, 2013).

57

58 As the rostrocaudal axis elongates, NMPs that enter the primitive streak downregulate SOX2,  
59 upregulate TBX6, and contribute to the developing somites (Javali et al., 2017; Takemoto et al., 2011).  
60 In contrast, neural commitment begins in the pre-neural tube (PNT), located immediately rostral to  
61 the NMP niche (Ruth Diez del Corral, Breitkreuz, & Storey, 2002). In the PNT, cells no longer express  
62 *TBXT*, but maintain expression of *SOX2* and *NKX1-2* (I. Olivera-Martinez & Storey, 2007; Storey et al.,  
63 1998). Neurogenic genes such as *PAX6* and *NEUROG2* are not upregulated in this region due to  
64 repression from the continued FGF signalling (R. Diez del Corral et al., 2003; Lunn, Fishwick, Halley, &  
65 Storey, 2007). The next step of neural commitment is prompted by the exposure of cells to retinoic  
66 acid (RA) from the adjacent somites as they migrate out of the PNT region and into the neural tube.  
67 The switch from FGF to RA signalling alleviates repression of the neural transcription factors *PAX6* and

68 *IRX3* and down regulates *NKX1-2* (R. Diez del Corral et al., 2003; Sasai, Kutejova, & Briscoe, 2014; Shum  
69 et al., 1999).

70

71 Attempts have been made *in vitro* to recapitulate the developmental pathways leading to anterior or  
72 posterior NSCs. Anterior NSCs can be generated from hPSCs via dual TGF- $\beta$  (Activin/BMP) inhibition  
73 (Chambers et al., 2009). Initial attempts to generate spinal cord progenitors relied on posteriorising  
74 anterior NSCs through exposure to retinoic acid or Wnt and FGF treatments (Lee et al., 2007; X. J. Li  
75 et al., 2005; Mazzoni et al., 2013; Peljto, Dasen, Mazzoni, Jessell, & Wichterle, 2010; Wichterle,  
76 Lieberam, Porter, & Jessell, 2002). However, this yielded neural derivatives as far posterior as  
77 hindbrain and upper cervical regions, primarily through saltatory expression of *HOX(1-5)* genes, but  
78 did not yield spinal cord progenitors with thoracic or lumbar identities. Consistent with *in vivo*  
79 evidence, combined Wnt and FGF stimulation efficiently converted mouse or human PSCs into NMP-  
80 like cells, which are becoming a promising source to make spinal cord tissue for cell replacement  
81 therapies (Frith et al., 2018; Gouti et al., 2014; Lippmann et al., 2015; Turner et al., 2014; Verrier,  
82 Davidson, Gierlinski, Dady, & Storey, 2018). However, *in vitro* derived NMPs are difficult to maintain  
83 and often fail to trigger the full range of HOX-mediated regionalisation along the rostrocaudal axis.  
84 Thus, few protocols have been developed that generate all rostrocaudal regions (cervical, thoracic,  
85 lumbar and sacral) of the spinal cord (Kumamaru et al., 2018; Lippmann et al., 2015). Here we describe  
86 *in vitro* conditions which commit NMPs to pre-neural progenitors (PNPs). These PNPs are stable for  
87 up to 10 passages (30 days) and can also generate neural crest (NC) derivatives across a full range of  
88 rostrocaudal identities. PNPs can be locked in a thoracic identity and maintained long term in culture  
89 by the addition of TGF $\beta$  inhibitors to the medium. Furthermore, PNPs can give rise to a variety of spinal  
90 cord derivatives, including motor neuron and interneuron subtypes, through the addition of a sonic  
91 hedgehog (SHH) agonist. Our protocol will advance research into spinal cord replacement therapy and  
92 in-depth modelling of both spinal cord and neural crest disorders.

93

## 94 **RESULTS**

### 95 **Optimising the generation of NMP-like cells from hPSCs through Wnt modulation**

96 Previous studies have shown that Wnt/FGF signalling causes mouse and human PSCs to adopt  
97 neuromesodermal bipotency (Frith et al., 2018; Gouti et al., 2014; Lippmann et al., 2015; Turner et al.,  
98 2014; Verrier et al., 2018). Human NMP protocols differ in both the magnitude and time window of  
99 Wnt stimulation, as well as with respect to the addition of other signal modulators including FGF  
100 (Figure 1 - figure supplement 1A)(Denham et al., 2015; Edri, Hayward, Baillie-Johnson, Steventon, &  
101 Martinez Arias, 2019; Frith et al., 2018; Gomez et al., 2019; Gouti et al., 2014; Kumamaru et al., 2018;

102 Lippmann et al., 2015; Verrier et al., 2018; Wang et al., 2019). To find the critical Wnt signalling  
103 threshold for the generation of NMP-like cells from the WA09 (H9) hESC line, cells were seeded at a  
104 fixed density and 24h later exposed to increasing concentrations of the canonical Wnt agonist  
105 CHIR99021 (CHIR) while keeping FGF2 ligands constant (Figure 1A). Our culture medium lacked the  
106 retinoic acid (RA) precursor vitamin A (retinol) and contained the pan-RA receptor (RAR) inverse  
107 agonist AGN193109 (AGN) (Klein et al., 1996). RA neuralises multipotent cells, so its degradation by  
108 CYP26A1 is essential for NMP maintenance (Abu-Abed et al., 2001; Benjamin L. Martin & Kimelman,  
109 2010; Sakai et al., 2001). Yet, the RA receptor gamma (RAR $\gamma$ ) is highly expressed in NMPs suggesting  
110 that transcriptional repression mediated by RAR $\gamma$  in the absence of its ligand supports NMPs and axial  
111 elongation (Amanda Janesick et al., 2014). AGN addition reduced aldehyde dehydrogenase (ALDH)  
112 activity suggesting that endogenous RA synthesis was inhibited (Figure 1 – figure supplement 1B).

113  
114 After 36h, when cultures reached confluency, cells were analysed for SOX2, TBXT and CDX2 expression  
115 by immunofluorescence (Figure 1B,C). Low concentrations of CHIR (0-1 $\mu$ M) caused cells to express  
116 high SOX2 and to be negative for TBXT and CDX2. At 3 $\mu$ M CHIR, TBXT and CDX2 protein became  
117 detectable in some cells. At 5-10 $\mu$ M CHIR, TBXT and CDX2 levels were further elevated, while SOX2  
118 expression decreased with increasing concentrations of CHIR. Bearing in mind the role of POU5F1 (also  
119 known as OCT4) in maintaining pluripotency and axis elongation (Aires et al., 2016; Gouti et al., 2017),  
120 we also analysed expression of this protein at increasing CHIR concentrations. As expected, when cells  
121 were treated with rising CHIR concentrations, OCT4 expression was lost (Figure 1-figure supplement  
122 1C,D). Based on the co-expression of OCT4, SOX2, CDX2 and TBXT proteins, we determined that 5 $\mu$ M  
123 CHIR was the optimal concentration to generate NMPs using H9 hESCs at this cell density. We could  
124 also reliably generate NMP-like cells from WA01 (H1) hESCs and the AICS-ZO1-GFP iPSC line, which  
125 also required intermediate (but different) levels of Wnt activation (Figure 1 – figure supplement 2A,B).  
126 These data show that optimising the magnitude of Wnt signalling is important for obtaining NMP-like  
127 cells from different PSC lines.

128

### 129 **Transcriptional profiling reveals a common NMP gene set**

130 To further characterise our NMP-like cells, Wnt/FGF-induced transcriptional changes in H9 hPSCs were  
131 quantified by bulk RNA sequencing (RNA-Seq) after 36h. 1,367 genes were significantly differentially  
132 expressed between hESC and NMP stages (445 up and 922 down; FDR <1%, a fold change of at least  $\pm$   
133 2, and a base mean >100) (Supplementary file 1). The biological processes most significantly enriched  
134 within upregulated genes included ‘anterior-posterior pattern specification’ and ‘regionalisation’,  
135 processes which reflect the roles of NMPs *in vivo* (Figure 1D). To define a common gene set expressed

136 by *in vitro* NMPs, we compared our gene list of upregulated genes with two other NMP-related gene  
137 expression studies (Frith et al., 2018; Verrier et al., 2018). The comparison revealed 26 genes that  
138 were consistently upregulated in all three studies (Figure 1E, F). Among these were well-established  
139 NMP markers such as TBXT, WNT8A, CDX2, FGF17, FST and NKX1-2 (Figure 1F). Several novel genes  
140 were also identified, including AC007277.3, a long non-coding transcript, and TTC29 and EGFLAM, all  
141 of which may be useful as NMP markers. Overall, our results show that hPSC-derived NMPs generated  
142 in the absence of RA signalling express known *in vivo* NMP marker genes and share a distinct gene  
143 signature with other *in vitro* hPSC-derived NMPs.

144

### 145 **Prolonged culture of NMPs results in loss of mesodermal potency and the emergence of** 146 **epithelial SOX2<sup>+</sup>/CDX2<sup>+</sup> colonies**

147 NMPs have previously been maintained in culture for up to seven days (Lippmann et al., 2015), but it  
148 is necessary to culture them for longer than this to create enough cells for developmental and  
149 therapeutic assays. We sought to extend the culture of spinal cord progenitors by generating the  
150 posterior (SOX2<sup>+</sup>/CDX2<sup>+</sup>) equivalent of anterior (SOX2<sup>+</sup>/OTX2<sup>+</sup>) NSCs. To this end we dissociated and  
151 replated NMP-like cells at low density at 36h, suppressed RA signalling (by removal of vitamin A from  
152 the medium and treatment with AGN) and continued Wnt/FGF treatment to minimise mesodermal  
153 commitment while halting early neural commitment (Figure 2A).

154

155 Using immunofluorescence and RT-qPCR, we showed that these culture conditions maintain a  
156 SOX2<sup>+</sup>/CDX2<sup>+</sup> cell population for up to 10 passages, corresponding to ~30 days (Figure 2B,C). After one  
157 passage (P1) the cultures were heterogeneous with some cells expressing the NMP-characteristic  
158 TBXT<sup>+</sup>/SOX2<sup>+</sup>/CDX2<sup>+</sup> signature. By P3, TBXT and its immediate downstream target TBX6 were  
159 undetectable, but most cells continued to express CDX2 and SOX2, suggesting a loss of mesodermal  
160 and a maintenance of neural potency (Figure 2B-D). Over time, the number of SOX2<sup>+</sup>/CDX2<sup>+</sup> cells  
161 decreased and *SOX2/CDX2* transcript levels were dramatically reduced (Figure 2B,C). Replicate  
162 experiments showed the same trend, but the downregulation of *CDX2/SOX2* transcripts occurred at  
163 different rates (Figure 2 - figure supplement 1A,B).

164

165 By P5, the cell population had segregated into two types, as judged by bright-field and  
166 immunofluorescence imaging (Figure 2B and 2E): one formed compact SOX2<sup>+</sup>/CDX2<sup>+</sup> cell colonies,  
167 while the other was negative for SOX2/CDX2 and had acquired mesenchymal characteristics such as  
168 cell spreading and SNAI1 expression (Figure 2F). The SOX2<sup>+</sup>/CDX2<sup>+</sup> cells appeared to be epithelial,  
169 based on the accumulation of mEGFP-tagged zona occludens (ZO)-1 at tight junctions in transgenic

170 AICS iPSCs (Figure 2G). Together, our results showed that prolonged exposure of hPSCs to Wnt/FGF  
171 signalling with inhibition of RA signalling generates a semi-stable epithelial SOX2<sup>+</sup>/CDX2<sup>+</sup> progenitor  
172 population that could be maintained for up to 10 passages.

### 173 **NMPs form neural progenitors and neural crest derivatives over time**

174 To investigate gene expression changes during the transition of NMP-like cells into epithelial and  
175 mesenchymal populations, we profiled the transcriptomes of our cultures by bulk RNA-Seq across  
176 twelve time points from 24h after seeding hESCs (time 0, t0) to P10. Analysis of principle components  
177 1 and 2 (PC1 and PC2) showed that most biological replicates (n=2-3) clustered together and PC1 (43%  
178 variation) separated according to the duration between time points (Figure 3–figure supplement 1A).  
179 Some outliers were identified, which we presume to be a reflection of biological variation in our  
180 experiments. In support of this, outliers such P1.r1 and P2.r1 associated with the previous passage,  
181 such that P2.r1 clustered more closely to P1.r2 and P1.r3, suggesting that replicate 1 (r1) differentiated  
182 through the same transitions, but at a slower pace than r2 and r3.

183

184 Next, k-means hierarchical clustering was applied to all gene-specific profiles that were significantly  
185 different over at least two consecutive time points. Each of the gene clusters showed a distinct  
186 transcriptional behaviour over time (Figure 3A, Supplementary file 2). The genes of each cluster were  
187 analysed for enriched gene associated biological processes and the most significant four biological  
188 process gene ontology terms are listed in Figure 3B (Supplementary file 3). Clusters 2 (C2) and 6 (C6)  
189 showed elevated gene expression from P1 to P8, when cells robustly expressed SOX2 and CDX2.  
190 Consistent with the role of CDX2 in regulating colinear *HOX* gene expression, *CDX2* and *HOX(1-9)* genes  
191 were grouped together in C2, which showed ‘regionalization’ as the most enriched biological process  
192 (Amin et al., 2016; Neijts et al., 2017). Conversely, *SOX2* was clustered with other neural fate  
193 determinants including *SOX21*, *SP8* and *GBX2* in C6 (X. Li, Liu, Qiu, & Yang, 2014; Luu, Ellisor, & Zervas,  
194 2011; Sandberg, Kallstrom, & Muhr, 2005). Not surprisingly, this cluster was linked strongly with  
195 various biological functions of neurogenesis. As expected, the most posterior HOX genes were found  
196 in C4 and C9, which showed a peak of expression around P7-P8 and P9-P10, respectively. This was in  
197 line with previous findings indicating *HOX13* genes retro-inhibit anterior *HOX* and *CDX2* transcription  
198 (Denans, Imura, & Pourquie, 2015). Thus, we observed full colinear *HOX(1-13)* gene expression across  
199 ten passages (Figures 3C,D). The onset of terminal *HOX* gene expression varied in later passages,  
200 possibly reflecting slight variation in differentiation rates between experiments (Figure 3A,C, Figure  
201 3– figure supplement 2A,B). In parallel with the onset of terminal HOX expression, C4 and C9 included  
202 genes with elevated expression at P9 and P10 (Figure 3A). These clusters were enriched for  
203 differentiated tissues such as the skeletal system (C9) and the circulatory system (C4) suggesting that

204 cells at P7/P8 start to differentiate and this provides a genetic explanation for the decrease in cell  
205 viability and the increase in cell spreading at late passages (Figure 3A,B,E).

206

207 Similar to C4, C1 consisted of genes upregulated at P9/P10. C1 and C4 genes were enriched for cell  
208 death, cell migration and neural crest-related biological processes such as ossification, suggesting  
209 some loss of cell viability and the onset of cell differentiation in these later passages (Figure 3A,B).  
210 Together, these results suggest that cells become neural crest-like and then terminally differentiate,  
211 which would be in keeping with the crest-related tissue types identified within the GO term analysis  
212 of C4 and C9. This is also consistent with the decrease in cell viability, which we observe towards  
213 passage 10. Thus, NMPs form neural progenitors that become more posterior over time, together with  
214 subpopulations of migratory neural crest (NC) cells.

215

### 216 **NMP-derived cells stabilise as epithelial pre-neural progenitors**

217 To determine the extent to which NMP-derived cells undergo differentiation, epithelial and  
218 mesenchymal cells were enzymatically separated at P5, profiled by bulk RNA-Seq, and compared with  
219 the original NMP-like transcriptional profiles (Figure 4 - figure supplement 1A). The temporal  
220 progression from 36h to P5 accounted for the majority of gene variation (PC1, ~70%) that was  
221 detected. The lineage bifurcation of NMP descendants led to the identification of 907 differentially  
222 expressed genes between epithelial and mesenchymal cells (426 genes up in epithelial and 481 genes  
223 up in mesenchymal cells; FDR <1%,  $\geq 2$ -fold change, DESeq2 base mean >100 reads—supplementary  
224 file 4). Strikingly, the enrichment analysis of upregulated genes for cellular component GO terms  
225 showed that epithelial and mesenchymal cells were linked to key attributes of nerve cell  
226 differentiation (e.g. 'synapse' and 'axon') and neural crest cell migration (e.g. 'extracellular matrix' and  
227 'adherens junction'), respectively (Figure 4A,B). Molecular function GO terms for both samples were  
228 similar, and primarily reflected the large number of transcription factors expressed, but also included  
229 'growth factor binding' terms which represented WNT/FGF signalling genes in addition to TGF $\beta$   
230 superfamily signalling genes (Supplementary file 5). Few of these genes were differentially expressed  
231 between epithelial and mesenchymal samples, and they included both positive (BMP4/5/7) and  
232 negative (GREM1 and CER1) regulators of TGF $\beta$  signalling (Figure 4 – figure supplement 1B,  
233 Supplementary file 5). Together this analysis further suggests that the epithelial cells, unlike the  
234 mesenchymal cells, are a neuronal cell type and that endogenous signalling events influence cell  
235 identity over time.

236

237 Next, a panel of previously established NMP, pre-neural progenitors (PNP) and neural progenitor (NP)  
238 marker genes were used to pinpoint neural progression *in vitro* (Isabel Olivera-Martinez et al., 2014;  
239 Ribes et al., 2008; Verrier et al., 2018). As expected, 36h cells were positive for NMP markers (*FGF8*,  
240 *WNT3A* and *TBXT*) and NMP/PNP (*SOX2*, *NKX1-2* and *WNT8A/C*), while the NP determinants *PAX6*,  
241 *IRX3* and *SOX1* were hardly transcribed (Figure 4C). By P5, epithelial cells had lost most NMP-exclusive  
242 expression, while the PNP markers *SOX2* and *NKX1-2* were retained (Figure 4D). *NEUROG2* and *FGFR2*,  
243 two PNT/NT markers, were also active in P5 epithelial cells (Isabel Olivera-Martinez et al., 2014; Ribes  
244 et al., 2008). Furthermore, neural progenitor markers were low or absent in epithelial P5 cells (Figure  
245 4D). Immunofluorescence for *TBXT*, *SOX2* and *PAX6* confirmed this transcriptional analysis, some of  
246 which was further validated by RT-qPCR (Figure 4 – figure supplement 1C). Together, we find that  
247 epithelial colonies have a PNP identity and do not express key neural maturation genes.

248

#### 249 **NMP-derived mesenchymal cells are NC**

250 We next sought to determine the identity of the mesenchymal cells. *In vitro* studies have revealed  
251 that NMPs can become trunk NC cells, a migratory mesenchymal cell population which goes on to  
252 form tissues including cartilage, bone and smooth muscle (Frith et al., 2018; Hackland et al., 2019;  
253 Leung et al., 2016). Moreover, our bulk RNA-Seq suggested that over passaging there was an increase  
254 in genes associated with cell migration and NC derivatives, concomitant with the reduction of  
255 epithelial cells and increase of differentiating mesenchymal cells in late passages (Figures 2E and  
256 3A,B). Thus, we first determined whether mesenchymal P5 cells had acquired NC-specific gene  
257 expression. Transcriptome-wide analysis showed that several NC markers genes, including *SNAI1*,  
258 *SOX9* and *SOX10*, were significantly higher in mesenchymal cells compared with their epithelial PNP  
259 counterparts (Figure 5A). This was corroborated by immunofluorescence of P5 tissue cultures, which  
260 showed *SNAI1*<sup>+</sup> and *SOX10*<sup>+</sup> mesenchymal cells scattered between *SOX2*<sup>+</sup>/*CDX2*<sup>+</sup> PNP colonies (Figures  
261 2B and 5B). In support of a posterior NC identity, mesenchymal P5 and P8 cells progressively expressed  
262 more posterior *HOX* genes, mirroring the PNP rostrocaudal identity (Figure 3C). By contrast, the cranial  
263 NC marker *ETS1* was only detectable in a few mesenchymal cells (Figure 5C). To determine if  
264 mesenchymal cells were capable of generating NC derivatives, mesenchymal P5 cells were exposed to  
265 1% fetal calf serum (FCS) for 7 days to convert them into NC-derived vasculature smooth muscle,  
266 containing cytoplasmic fibres of  $\alpha$ -smooth muscle actin ( $\alpha$ -SMA also known as *ACTA2*; Figure 5D,E)  
267 (Mohlin et al., 2019). Together, these results show that the mesenchymal cells surrounding PNPs are  
268 functional posterior NC cells.

269

#### 270 **NMP-derived trunk PNPs are stem cell-like and give rise to migratory NC**



271 The immunofluorescence analysis of fixed PNP/NC cell cultures revealed that some nuclei found  
272 within tightly clustered PNP colonies were negative for CDX2, but positive for SNAI1, suggesting that  
273 they are undergoing epithelial-to-mesenchymal transition (EMT) and becoming NC cells (Cano et al.,  
274 2000; Simoes-Costa & Bronner, 2015) (Figure 6A, 2B,E). To test this idea, PNP colonies (CDX2<sup>+</sup>/SNAI1<sup>-</sup>  
275 ) purified from NC cells using selective detachment were sub-cultured for four passages (P+1 to P+4)  
276 (Figure 6B). Immunofluorescence staining showed that, despite the near complete absence of SNAI1<sup>+</sup>  
277 NC cells in P+1 cultures, by P+4 30% of the cells were mesenchymal (CDX2<sup>-</sup>/SNAI1<sup>+</sup>) suggesting that  
278 PNPs undergo EMT to generate NC cells (Figure 6B,C). To exclude the possibility that after PNP  
279 purification, a few remaining NC cells repopulate the culture over passaging, single PNP or NC cells  
280 were plated by fluorescence-activated cell sorting (FACS) into single wells (Figure 6 - figure supplement  
281 1A). No colonies arose from single NC cells, suggesting that these cells have limited proliferative  
282 capacity. By contrast, single PNPs gave rise to clonal cell lines which consisted of epithelial colonies  
283 (CDX2<sup>+</sup>/SOX2<sup>+</sup>), and surrounding NC cells (Figure 6D,E). Thus, the PNPs showed stem cell-like  
284 behaviour by undergoing self-renewal and differentiating to form NC cells.

285

### 286 **Modulation of TGF- $\beta$ and SHH signalling locks in PNP rostrocaudal axis information**

287 We have shown that the combined modulation of Wnt/FGF and RA signalling generated posterior  
288 PNPs. However, transcriptomics and lineage analysis indicated that PNP maintenance is compromised  
289 by NC bifurcations, the progressive activation of more posterior HOX genes, and late-passage  
290 differentiation/cell death. In an attempt to prevent this progressive posteriorisation and NC  
291 commitment, we supplemented our culture medium with modulators of other signalling pathways  
292 (Figure 7A). Inhibitors of Activin/Nodal (SB431542, SB) and BMP (LDN193189, LDN) signalling were  
293 used to suppress EMT and NC specification (Cuny et al., 2008; Das, Becker, Hoffmann, & Mertz, 2009;  
294 Halder, Beauchamp, & Datta, 2005; Inman et al., 2002; K. F. Liem, Jr., Tremml, & Jessell, 1997;  
295 Stuhlmiller & Garcia-Castro, 2012). Furthermore, to mimic signals that arise from the notochord to  
296 ventralise neural progenitors during neural tube folding/cavitation, a smoothed agonist (SAG) was  
297 used to stimulate Sonic Hedgehog (SHH) signalling (Jessell, 2000; Sasai et al., 2014).

298

299 The combined addition of SB and LDN (+SBLDN) or SB and SAG (+SBSAG) at P3 resulted in stabilisation  
300 of PNPs for over 15 passages (60 days). At early passages (P5/P6), the addition of small molecules did  
301 not compromise the formation of CDX2<sup>+</sup>/SOX2<sup>+</sup> PNPs, which organised into typical tightly associated  
302 colonies surrounded by loosely packed SNAI1<sup>+</sup> cells. (Figure 7B, Figure 7 - figure supplement 1A).  
303 However, both supplemented conditions modestly increased the percentage of SOX2<sup>+</sup>/CDX2<sup>+</sup> cells as  
304 quantified by flow cytometry at later passages (P9/P10) (Figure 7C, Figure 7 - figure supplement 1B).

305 Cells maintained in +SBSAG and +SBLDN significantly prolonged *CDX2* and *SOX2* gene expression for  
306 up to 15 passages (Figure 7D). Moreover, based on the transcriptional profiling of *HOX* genes, the  
307 positional value of the PNPs was locked at the thoracic level, considerably slowing down the  
308 upregulation of terminal *HOXC13* and *HOXA13* (Figure 7E, Figure 7 - figure supplement 1C,D). Verrier  
309 et al. (2018) used the dual inhibition of Nodal/Activin and BMP signals to generate RA-induced neural  
310 progenitors from NMPs. However, these cells were not maintained over long time periods presumably  
311 because of their exposure to RA. In our tissue cultures, the RA target *PAX6* remained silent in +SBLDN  
312 or +SBSAG addition at P6/7 (Figure 7 - figure supplement 1E). These results therefore show that PNPs  
313 can be locked in a thoracic identity and grown in culture for long periods of time via the addition of  
314 TGF- $\beta$  inhibitors to the media.

315

### 316 **PNPs can give rise to spinal cord neurons**

317 To establish whether these RA-deprived PNPs can generate neurons, we exposed them to a cocktail  
318 of terminal differentiation inducers for 12-24 days to cause them to terminally differentiate as  
319 neurons (Figure 8A). This resulted in neuronal cultures expressing the neuronal nuclei marker (NeuN),  
320 neuron-specific  $\beta$ III-tubulin (TUJ) and *SOX2* (Figure 8B). As expected, higher yields of *ISL1*<sup>+</sup> and *CHX10*<sup>+</sup>  
321 cells were noted in +SBSAG PNP-derived cultures, suggesting SHH signalling promotes the  
322 specification of motor neurons (*ISL1*<sup>+</sup>/*TUJ*<sup>+</sup>) or V2a interneurons (*CHX10*<sup>+</sup>/*TUJ*<sup>+</sup>) (Figure 8C) (Clovis et  
323 al., 2016; Le Dréau & Martí, 2012; Thaler, Lee, Jurata, Gill, & Pfaff, 2002). Together, these results show  
324 that PNPs grown with or without TGF- $\beta$  inhibitors have the potential to generate neuronal derivatives  
325 and that PNP may be responsive to ventralising signals.

326

### 327 **DISCUSSION**

328 The NMP niche is maintained by Wnt/FGF-mediated autoregulatory loops, CYP26A1-mediated RA  
329 signal suppression, and active RAR $\gamma$ -mediated transcriptional repression (Abu-Abed et al., 2001;  
330 Cunningham, Kumar, Yamaguchi, & Duester, 2015; Deng et al., 1994; Amanda Janesick et al., 2014;  
331 Koide, Downes, Chandraratna, Blumberg, & Umesono, 2001; Liu et al., 1999; B. L. Martin & Kimelman,  
332 2008; Benjamin L. Martin & Kimelman, 2010; Sakai et al., 2001; Takada et al., 1994; Takemoto,  
333 Uchikawa, Kamachi, & Kondoh, 2006; Yamaguchi, Takada, Yoshikawa, Wu, & McMahon, 1999). By  
334 simultaneously controlling these multiple signalling pathways *in vitro*, we have generated regionalised  
335 spinal cord progenitors and neural crest cells from hPSCs. Our protocol consistently yields a well-  
336 defined population of PNPs and NC cells characteristic of different positions along the rostrocaudal  
337 axis, providing a valuable source of spinal cord cells and neural crest which might be used for  
338 therapeutic applications, drug screening, or detailed disease modelling. In particular, we hope that

339 use of our protocol will improve our understanding of selective neuronal vulnerability, a recognised,  
340 yet poorly understood feature of neurodegenerative disease and spinal cord injury.

341

342 Previous studies show that *in vitro* generated NMPs, when passaged back into FGF/CHIR or CHIR  
343 alone, commit to a mesodermal lineage (Gouti et al., 2014; Turner et al., 2014). In contrast, we  
344 observed a gradual decrease in TBXT and TBX6 expression, and commitment of NMP-like cells to  
345 a neural trajectory. Interestingly, this appeared to occur independently of RA signalling. More  
346 recently, Edri *et al.*, (2019) found NMPs differentiated from mouse epiblast stem cells (EpiSCs), rather  
347 than ESCs, resemble more accurately their counterparts *in vivo* and have a similar progressive  
348 commitment to a neural fate after passaging (Edri et al., 2019). This is in line with our observations  
349 using hPSCs, and could reflect that hPSCs correspond more closely to the primed pluripotency state  
350 of mouse EpiSCs (Brons et al., 2007; Nichols & Smith, 2011). Compared to previous studies of *in vitro*-  
351 derived NMPs, the PNPs reported here are a more stable source of spinal cord as their maintenance  
352 does not depend on the delicate balance between TBXT and SOX2, and they do not express critical  
353 RA-responsive neurogenic genes like PAX6 and SOX1, which would promote their fate progression to  
354 spinal cord neurons (Gentsch, Monteiro, & Smith, 2017; A. Janesick, Wu, & Blumberg, 2015).

355 While PNPs were efficiently derived from NMPs, their long-term maintenance was accompanied by  
356 progressive posteriorisation and NC delamination. Thus, to promote PNP self-renewal, we tried to  
357 mimic the niche environment of axial stem cells by inhibiting TGF $\beta$  signalling and stimulating hedgehog  
358 signalling. TGF $\beta$  signal inhibition favoured PNP fate over time and locked progenitors in a thoracic HOX  
359 identity for over 15 passages, identifying the importance of TGF $\beta$  signal inhibition in PNT/ PNP  
360 formation. Previous *in vivo* data supports this observation, as the inhibitory TGF $\beta$  signal transducer  
361 *SMAD6*, is specifically expressed in the PNT, while *FST* is required for dorsal-ventral patterning and  
362 neuronal fate specification in response to SHH signalling (K. F. Liem, Jessell, & Briscoe, 2000; Isabel  
363 Olivera-Martinez et al., 2014). Specifically, our data indicates Actvin/Nodal pathway inhibition may be  
364 sufficient to promote PNP identity in our culture, but perhaps acting to further enforce TGF $\beta$   
365 superfamily inhibition which occurs at a low-level through FGF mediated repression of the BMP  
366 pathway (Furthauer, Van Celst, Thisse, & Thisse, 2004; Guo & Wang, 2009; Pera, Ikeda, Eivers, & De  
367 Robertis, 2003).

368 Our work also established that PNPs undergo EMT to form NC cells with corresponding rostrocaudal  
369 identity. Recent studies have shown that cranial NC is specified at the neural plate border and trunk  
370 NC arises from the NMP niche (Frith et al., 2018; Stuhlmiller & Garcia-Castro, 2012; Wymeersch et al.,  
371 2016). Concurrent with this idea, we demonstrated that NMP-derived PNPs have the potential to

372 generate trunk NC cells (Figure 9). Single PNPs gave rise to more PNPs ('self-renewal') and migratory  
373 NC cells indicating that trunk NC cells delaminate from the PNT (Frith et al., 2018; Gouti, Metzis, &  
374 Briscoe, 2015; Sasai et al., 2014). Here we are able to maintain PNPs which give rise to NC as they  
375 progress through a rostral to caudal identity. We did not observe any direct NC specification from  
376 NMPs. However, this remains a possibility which will be interesting to explore further.

377

## 378 **ACKNOWLEDGEMENTS**

379 We thank members of the following scientific platforms and units of the Francis Crick Institute for  
380 their expertise, support and use of the facilities: advanced sequencing facility, advanced light  
381 microscopy facility, the human embryo and stem cell unit, bioinformatics and biostatistics and  
382 research illustration and graphics. We also thank Rickie Patani, Jamie Mitchell, James Briscoe, Vicki  
383 Metz, Teresa Rayon, Alessia Caramello, Robin Lovell-Badge, Siew-Lan Ang and Francois Guillemot for  
384 advice, help and reagents; Rebecca Jones and Clara Collart for critical reading of the manuscript; and  
385 the Smith lab for discussions and advice. This work was supported by the Francis Crick Institute which  
386 receives its core funding from Cancer Research UK (FC001-157), the UK Medical Research Council  
387 (FC001-157), and the Wellcome Trust (FC001-157) *and* a British Heart Foundation award  
388 (FS/12/37/29516). A.S.B. was supported by the British Heart Foundation (FS/12/37/29516) and is now  
389 supported by the Wellcome Trust (210987/Z/18/Z). J.C.S. was supported by the Medical Research  
390 Council (program number U117597140) and is now supported by the Francis Crick Institute, which  
391 receives its core funding from Cancer Research UK (FC001-157), the UK Medical Research Council  
392 (FC001-157), and the Wellcome Trust (FC001-157).

393

## 394 **CONTRIBUTIONS**

395 FC: Conceptualization, Validation, Conceptualization, Methodology, Investigation, Formal analysis,  
396 Writing—original draft, Supervision, Project administration

397 GEG: Conceptualization, Methodology, Investigation, Supervision, Project administration, Writing—  
398 review & editing

399 RM: Software, Methodology, Formal analysis, Writing—review & editing

400 CB: Investigation, Writing—review & editing

401 LH: Methodology, Investigation, Resources, Writing—review & editing

402 ARH: Investigation

403 JCS: Conceptualization, Writing—review & editing, Supervision, Funding acquisition

404 ASB: Conceptualization, Methodology, Investigation, Writing—review & editing, Supervision, Project  
405 administration, Funding acquisition

406

407 **COMPETING INTERESTS**

408 The authors have no competing interests to declare

409

410 **METHODS**

411 **Human pluripotent stem cell culture**

412 Human ESCs (WA09 and WA01, WiCell) and human iPSCs (AICS-23, Allen Institute) were maintained in  
413 feeder-free cultures, plated on Corning Matrigel Growth Factor Reduced (GFR) Basement Membrane  
414 Matrix (Corning Incorporated, 354230) and grown in mTESR1 (STEMCELL technologies, 85850). Cells were  
415 passaged as aggregates at a ratio of 1:10/15 using Gibco Versene Solution (Thermo Fisher Scientific,  
416 15040066). All experiments were completed within 15 passages after recovery from cryopreservation and  
417 screened for mycoplasma monthly. Prior to cryopreservation, hPSCs were assessed for genetic stability by  
418 KaryoStat and indicators of pluripotency were assessed by PluriTest (Thermo Fisher Scientific). hPSCs were  
419 subject to routine pluripotency using BD Stemflow Human and Mouse Pluripotent Stem Cell Analysis Kit  
420 (BD Biosciences, 560477) as recommended by the manufacturers, or by immunostaining against OCT3/4,  
421 SOX2 and NANOG (see Table S5 for antibody details) using the standard immunostaining protocol below.  
422 All experiments with hESCs were approved by the UK Stem Cell Bank steering committee (SCSC13-03).

423

424 **NMP differentiation**

425 For differentiation into NMPs, confluent hPSCs were dissociated into single cells using Gibco TrypLE Express  
426 (Thermo Fisher Scientific, 12604013) and plated at a density of 50,000 cells/cm<sup>2</sup> on Matrigel hESC-  
427 Qualified Matrix (Corning Incorporated, 354277). Cells were plated in mTESR1 supplemented with 10 μM  
428 Y-27632 (Tocris, 1254) for a 24h to 36h to allow recovery before starting differentiation into NMPs.  
429 Following recovery time, cells were grown in Dulbecco's Modified Eagle Medium/Nutrient Mixture F-12  
430 (DMEM/F-12, Thermo Fisher Scientific, 10565018) supplemented with 1x Gibco B-27 supplement minus  
431 vitamin A (Thermo Fisher Scientific, 12587010) and 1x Gibco N2 (Thermo Fisher Scientific, 17502048), 4-6  
432 μM CHIR-99021 (Selleck Chem, S2924-SEL-5mg), 10 μM AGN193109 sodium salt (Santa Cruz, sc-210768)  
433 and 20 ng/ml FGF2 (R&D systems, 233-FB-025) referred to from now on as NMP differentiation medium.  
434 NMP differentiation medium was supplemented with and 5 μM Y-27632 (Tocris).

435

436 **PNP long term culture**

437 To generate PNPs, NMPs were passaged at 36h using TrypLE express (Thermo Fisher Scientific) and when  
438 confluent thereafter. Cells were passaged as single cells at a ratio of 1:6 into NMP differentiation medium,  
439 supplemented with 10 μM Y-27632 (Tocris). During passage 1 to 3 progenitors were found to detach from  
440 the dish forming spheres. If this occurred, spheres were dissociated into single cells and re-plated  
441 immediately. PNP generation was more successful if cells did not detach, therefore, to prevent cells

442 detaching during this period cells were passaged before reaching high confluency. In addition, cells were  
443 only removed from the 37°C incubator when ready to passage, as the temperature fluctuations promoted  
444 detachment. From passage 3 cells were grown NMP differentiation medium supplemented with 5 µM Y-  
445 27632 (Tocris). Human iPSCs were found to detach more readily than hESCs. PNPs could be maintained, for  
446 8 to 12 passages using standard conditions as above, passaging every 3-4 days when 80-90% confluent. To  
447 lock A-P axis progression, 2 µM SB431542 (CELL guidance systems, SM33-10) and 100 nM LDN193189  
448 (Sigma-Aldrich, SML0559-5MG) or SB431542 (CELL guidance systems, SM33-10) and 500nM smoothed  
449 agonist (SAG, Sigma-Aldrich, 566660-1mg) were added to NMP differentiation medium at passage 3. For  
450 selective detachment, 90% confluent PNPs were washed with PBS and treated with TrypLE express  
451 (Thermo Fisher Scientific) at 37°C for 3-5 mins. When mesenchymal cells started to detach, cells were  
452 gently removed by tilting the plate side-to-side. TrypLE containing the detached mesenchymal cells was  
453 carefully removed. Remaining epithelial cells were washed off the vessel using basal medium.

454

#### 455 **Neuronal differentiation**

456 To generate neurons, we used a modified protocol based on a previously published neural  
457 differentiation protocol (Lippmann et al., 2015). 80-90% confluent PNP/NC cultures were dissociated  
458 to single cells and plated at 1:20-1:30 onto Matrigel hESC-Qualified matrix (Corning) into the  
459 applicable former culture medium (NMP differentiation medium plus or minus SB/LDN or SB/SAG).  
460 24h after plating, medium was replaced with neural differentiation medium consisting of Gibco neural  
461 basal medium (Thermo Fisher Scientific, 21103049) supplemented with Gibco 1x B-27 supplement  
462 (Thermo Fisher Scientific, 17504044) and 1x N2 (Thermo Fisher Scientific), 2 µM DAPT (Chem Cruz, sc-  
463 201315) and 10 ng/ml brain-derived neurotrophic factor (BDNF, PeproTech, 450-02-2UG), 10 ng/ml  
464 glial-derived neurotrophic factor (GDNF, PeproTech, 450-10-2UG), 100 nM retinoic acid (RA, Sigma  
465 Aldrich, sc-210768) and 1 mM cAMP (Sigma Aldrich, A6885-100mg) for 12-24 days. When 100%  
466 confluent cells were passaged using TrypLE express and replated as single cells into neural  
467 differentiation medium (as above) supplemented with 10 µM Y-27632 (Tocris) for the first 24h. During  
468 neural induction and maintenance, growth medium was replaced every 48h.

469

#### 470 **Neural crest differentiation**

471 To differentiate NC cells, 80-90% confluent PNP/NC cultures at P5 were dissociated to single cells and  
472 plated at 1:10 onto Matrigel hESC-Qualified matrix (Corning) into DMEM:F12 (Thermo Fisher  
473 Scientific) supplemented with 1x B27 supplement (Thermo Fisher Scientific) and 1% Fetal Bovine  
474 Serum (FBS, Sigma Aldrich, F754) (Mohlin et al., 2019). Medium was replenished every 48h for 7 days.

475

#### 476 **Immunofluorescence microscopy**

477 Cells were cultured in 8 or 12 well  $\mu$ -slides (Ibidi) and fixed by adding ice-cold 4% Pierce formaldehyde  
478 (w/v) methanol-free (Thermo Fisher Scientific, 28908) in PBS for 10-15 mins. Cells were permeabilised  
479 in PBS supplemented with 0.1% (v/v) Triton-X100 (Sigma Aldrich, T8787-250ML) for 10 mins and then  
480 blocked solution consisting of PBS supplemented with 0.1% (v/v) Triton-X100 (Sigma Aldrich), 5% (v/v)  
481 Donkey serum (Merck Millipore, S30-100ML) for more than 1h at room temperature. Primary  
482 antibodies were incubated in blocking solution at 4°C overnight in concentrations detailed in Table S6.  
483 Cells were then washed in PBS and incubated in Donkey AlexaFluor conjugated secondary antibodies  
484 (Abcam) diluted at 1:400 in blocking solution for more than 1 hour at room temperature. Cells were  
485 mounted in Vectorshield antifade mounting medium containing DAPI (Vector Laboratories, H-1200-  
486 10). Cells were imaged using two imaging systems; 1) by a Zeiss LSM710 confocal microscope (Carl  
487 Zeiss AG) using Zeiss Plan-Apochromat 20x/0.8 or 10x/0.45 objective (Carl Zeiss AG) controlled by ZEN  
488 Black 2012 software (Carl Zeiss AG); and 2) by an inverted Olympus IX83 microscope (Olympus  
489 Corporation) using an Olympus super-apochromatic 20x/0.75 objective (Olympus Corporation),  
490 captured using a Hamamatsu Flash 4.0 sCMOS camera (Hamamatsu photonics), a Spectra X(LED) light-  
491 source (Lumencore) and controlled by CellSens Dimension software (Olympus Corporation)). Post-  
492 acquisition analysis was performed using (Fiji) Image J (Schindelin et al., 2012). Briefly, nuclear  
493 segmentation was achieved using a fixed binary threshold using DAPI, the fluorescence intensity  
494 (mean grey value) of each channel was masked back to nuclei.

495

#### 496 **Flow Cytometry**

497 Cells were collected using Gibco TrypLE express (Thermo Fisher Scientific) dissociation, fixed by adding  
498 ice-cold 4% Pierce formaldehyde (w/v) methanol-free (Thermo Fisher Scientific) in PBS for 15 mins,  
499 and washed using PBS. Cells were permeabilised with PBS/0.5% Triton-X100 for 15m and blocked with  
500 PBS supplemented with 0.1% (v/v) Triton-X100 (Sigma Aldrich), 1% BSA fraction V (w/v) (Sigma-  
501 Aldrich, A3059) for 1hr while mixing on a slow speed gyratory motion shaker. Primary incubations  
502 were completed in blocking buffer using Alexa Fluor 488 Mouse anti-SOX2 (BD Pharmingen, O30-678)  
503 and Alexa Fluor® 647 Mouse anti-CDX-2 (BD Pharmingen, M39-711,). After washes, fluorescence was  
504 immediately measured on a LSR II cytometer (BD Biosciences) and results were analysed using FlowJo  
505 software (FlowJo LLC). Gates used to determine percentage of positive cells were designed based on  
506 fluorescence levels detected in the control samples, which included both Alexa Fluor 488 Mouse IgG1  
507  $\kappa$  (MOPC-21, BD Pharmingen and Alexa Fluor 647 Mouse IgG1  $\kappa$  (BD Pharmingen, MOPC-31C) isotype  
508 control isotype and unstained sample. Aldehyde dehydrogenase activity was measured as per the  
509 manufacturer's guidelines using the ALDEFLUOR Kit (STEMCELL Technologies, 01700). Fluorescence

510 was measured on a LSR II cytometer (BD Biosciences) and analysed using FlowJo software (FlowJo  
511 LLC).

512

### 513 **Clonal expansion of PNP and NC cells**

514 To generate sub-clonal PNP and NC cell lines, passage 5 cells were selectively detached and dissociated  
515 into single cells using TrypLE express (Thermo Fisher Scientific) as previously described. Cells were  
516 resuspended into RPMI 1640 (Thermo Fisher Scientific, 32404-014) supplemented with 10% (v/v)  
517 KnockOut serum replacement, (KSR, Thermo Fisher Scientific, 10828028) and 10  $\mu$ M Y-27632 (Tocris).  
518 Cells were sorted using a MoFlo XPD (Beckman Coulter) using FSC and SSC profile to select single, live  
519 cells. Cells were sorted into Matrigel hESC-Qualified Matrix (Corning) coated 96 well plates (Corning)  
520 containing NMP differentiation medium. Surviving cells were subsequently passaged TrypLE express  
521 (Thermo Fisher Scientific) to expand clonal population as previously described above.

522

### 523 **RNA extraction, cDNA synthesis and qPCR**

524 Total RNA extraction was completed using RNEasy mini kit (Qiagen, 74106) following the  
525 manufacturer's instructions. cDNA was synthesised using Maxima First Strand cDNA Synthesis Kit for  
526 RT-qPCR with dsDNase (Thermo Fisher Scientific, K1672) following manufacturer's instructions with  
527 the addition of a dilution step where cDNA was diluted 1:60 in water. qPCR analysis was performed  
528 using primers detailed in Table S5 on a Roche Lightcycler 480 II (Roche Holding AG) using LightCycler  
529 480 SYBR Green I Master mix (Roche Holding AG, 04887352001). Relative expression was calculated  
530 using the  $\Delta\Delta$ Ct method, normalising each gene to porphobilinogen deaminase (PBGD) levels.

531

### 532 **RNA-sequencing**

533 RNA was extracted using RNEasy mini kit (Qiagen) following the manufacturer's instructions including  
534 recommended DNase digestion step. RNA concentration was measured on a on a GloMax (Promega  
535 Corporation) and RNA integrity on TapeStation (Agilent Technologies). Libraries were prepared using  
536 KAPA mRNA (PolyA) HyperPrep Kit (Roche Holding AG, KK8581) using 500 ng RNA per sample  
537 according to manufacturer's instructions. Libraries were sequenced using a HiSeq 4000 (Illumina  
538 Biotechnology) as follows: pooled to 4 nM, 75bp single end sequencing and up to 38 million reads per  
539 sample. Data is available at the GEO repository (accession number GSE150709).

540

### 541 **RNA-seq analysis**

542 Reads were Illumina adapter trimmed using Cutadapt v1.16 (M. Martin, 2011) and aligned against  
543 GRCh38 and Ensembl release 86 transcript annotations using STAR v2.5.2b (Dobin et al., 2013) via the



544 transcript quantification software RSEM v1.3.0 (B. Li & Dewey, 2011). Gene-level counts were rounded  
545 to integers and subsequently used for differential expression analysis with DESeq2 (Love et al., 2014).  
546 Differential expression analysis between pairwise replicate groups was thresholded for significance  
547 based on an  $FDR \leq 0.01$ , a fold-change of  $\pm 2$ , and a base-mean expression of  $\geq 100$ . PCA analysis  
548 was conducted on the normalised log transformed count data using the 10% most variable genes  
549 across samples. The volcano plot depicts the FDR and logFC statistics from the group DESeq2  
550 differential expression analysis between P5 epithelial and P5 mesenchymal samples. For hierarchical  
551 clustering analysis, genes that maintained their significance and direction of change across 2  
552 consecutive time-points were selected for visualisation in a heatmap. K-means clustering ( $k=10$ ) was  
553 used to identify distinct gene clusters of related expression. Heatmaps show gene-level normalised  
554 counts, centred and scaled as z-scores. Gene ontology analysis was carried out using ToppGene Suite  
555 (ToppFun function) (Chen, Bardes, Aronow, & Jegga, 2009).

556

#### 557 **Comparison between data sets**

558 Previously published Affymetrix array data were downloaded from the NCBI Gene Expression  
559 Omnibus (GEO) as GSE109267 (Frith et al., 2018). Cell files were imported into R and RMA processed  
560 using the Bioconductor package oligo with default settings. Differential expression analysis between  
561 NMP and hESC replicate groups was assessed using limma (Ritchie et al., 2015). Genes with an FDR  
562 corrected p-value  $\leq 0.01$  and fold change  $\geq \pm 2$  were called significant. NMP high genes from the  
563 Verrier et al (2018) study were provided in supplementary data and subsequently filtered using a P-  
564 value of  $\leq 0.01$  (Verrier et al., 2018). The overlap between each genes list representing significantly  
565 upregulated genes at 36h was generated using BioVenn (Hulsen, de Vlieg, & Alkema, 2008). The  
566 overlap between each gene list was found to be significant ( $p < 1e-4$ , hypergeometric distribution).

567

568

569

570

571

572

573

574

575

576

577

578 REFERENCES

579

580 Abu-Abed, S., Dollé, P., Metzger, D., Beckett, B., Chambon, P., & Petkovich, M. (2001). The  
581 retinoic acid-metabolizing enzyme, CYP26A1, is essential for normal hindbrain  
582 patterning, vertebral identity, and development of posterior structures. *Genes &*  
583 *development*, 15(2), 226-240. doi:10.1101/gad.855001

584 Aires, R., Jurberg, A. D., Leal, F., Nóvoa, A., Cohn, M. J., & Mallo, M. (2016). Oct4 Is a Key  
585 Regulator of Vertebrate Trunk Length Diversity. *Developmental Cell*, 38(3), 262-274.  
586 doi:<https://doi.org/10.1016/j.devcel.2016.06.021>

587 Amin, S., Neijts, R., Simmini, S., van Rooijen, C., Tan, S. C., Kester, L., . . . Deschamps, J. (2016).  
588 Cdx and T Brachyury Co-activate Growth Signaling in the Embryonic Axial Progenitor  
589 Niche. *Cell Rep*, 17(12), 3165-3177. doi:10.1016/j.celrep.2016.11.069

590 Brons, I. G., Smithers, L. E., Trotter, M. W., Rugg-Gunn, P., Sun, B., Chuva de Sousa Lopes, S.  
591 M., . . . Vallier, L. (2007). Derivation of pluripotent epiblast stem cells from mammalian  
592 embryos. *Nature*, 448(7150), 191-195. doi:10.1038/nature05950

593 Brown, J. M., & Storey, K. G. (2000). A region of the vertebrate neural plate in which  
594 neighbouring cells can adopt neural or epidermal fates. *Current Biology*, 10(14), 869-  
595 872. doi:[https://doi.org/10.1016/S0960-9822\(00\)00601-1](https://doi.org/10.1016/S0960-9822(00)00601-1)

596 Cajal, M., Lawson, K. A., Hill, B., Moreau, A., Rao, J., Ross, A., . . . Camus, A. (2012). Clonal and  
597 molecular analysis of the prospective anterior neural boundary in the mouse embryo.  
598 *Development*, 139(2), 423-436. doi:10.1242/dev.075499

599 Cambray, N., & Wilson, V. (2002). Axial progenitors with extensive potency are localised to  
600 the mouse chordoneural hinge. *Development*, 129(20), 4855.

601 Cambray, N., & Wilson, V. (2007). Two distinct sources for a population of maturing axial  
602 progenitors. *Development*, 134(15), 2829. doi:10.1242/dev.02877

603 Cano, A., Perez-Moreno, M. A., Rodrigo, I., Locascio, A., Blanco, M. J., del Barrio, M. G., . . .  
604 Nieto, M. A. (2000). The transcription factor snail controls epithelial-mesenchymal  
605 transitions by repressing E-cadherin expression. *Nat Cell Biol*, 2(2), 76-83.  
606 doi:10.1038/35000025

607 Chambers, S. M., Fasano, C. A., Papapetrou, E. P., Tomishima, M., Sadelain, M., & Studer, L.  
608 (2009). Highly efficient neural conversion of human ES and iPS cells by dual inhibition  
609 of SMAD signaling. *Nat Biotechnol*, 27(3), 275-280. doi:10.1038/nbt.1529

610 Chen, J., Bardes, E. E., Aronow, B. J., & Jegga, A. G. (2009). ToppGene Suite for gene list  
611 enrichment analysis and candidate gene prioritization. *Nucleic Acids Res*, 37(Web  
612 Server issue), W305-311. doi:10.1093/nar/gkp427

613 Clovis, Y. M., Seo, S. Y., Kwon, J.-s., Rhee, J. C., Yeo, S., Lee, J. W., . . . Lee, S.-K. (2016). Chx10  
614 Consolidates V2a Interneuron Identity through Two Distinct Gene Repression Modes.  
615 *Cell Reports*, 16(6), 1642-1652. doi:<https://doi.org/10.1016/j.celrep.2016.06.100>

616 Cunningham, T. J., Kumar, S., Yamaguchi, T. P., & Duester, G. (2015). Wnt8a and Wnt3a  
617 cooperate in the axial stem cell niche to promote mammalian body axis extension.  
618 *Developmental dynamics : an official publication of the American Association of*  
619 *Anatomists*, 244(6), 797-807. doi:10.1002/dvdy.24275

620 Cuny, G. D., Yu, P. B., Laha, J. K., Xing, X., Liu, J.-F., Lai, C. S., . . . Peterson, R. T. (2008).  
621 Structure-activity relationship study of bone morphogenetic protein (BMP) signaling  
622 inhibitors. *Bioorganic & medicinal chemistry letters*, 18(15), 4388-4392.  
623 doi:10.1016/j.bmcl.2008.06.052

- 624 Das, S., Becker, B. N., Hoffmann, F. M., & Mertz, J. E. (2009). Complete reversal of epithelial  
625 to mesenchymal transition requires inhibition of both ZEB expression and the Rho  
626 pathway. *BMC cell biology*, *10*, 94-94. doi:10.1186/1471-2121-10-94
- 627 Delfino-Machin, M., Lunn, J. S., Breikreuz, D. N., Akai, J., & Storey, K. G. (2005). Specification  
628 and maintenance of the spinal cord stem zone. *Development*, *132*(19), 4273-4283.  
629 doi:10.1242/dev.02009
- 630 Denans, N., Imura, T., & Pourquie, O. (2015). Hox genes control vertebrate body elongation  
631 by collinear Wnt repression. *Elife*, *4*. doi:10.7554/eLife.04379
- 632 Deng, C. X., Wynshaw-Boris, A., Shen, M. M., Daugherty, C., Ornitz, D. M., & Leder, P. (1994).  
633 Murine FGFR-1 is required for early postimplantation growth and axial organization.  
634 *Genes & development*, *8*(24), 3045-3057. doi:10.1101/gad.8.24.3045
- 635 Denham, M., Hasegawa, K., Menhenniott, T., Rollo, B., Zhang, D., Hough, S., . . . Dottori, M.  
636 (2015). Multipotent Caudal Neural Progenitors Derived from Human Pluripotent Stem  
637 Cells That Give Rise to Lineages of the Central and Peripheral Nervous System. *STEM*  
638 *CELLS*, *33*(6), 1759-1770. doi:10.1002/stem.1991
- 639 Diez del Corral, R., Breikreuz, D. N., & Storey, K. G. (2002). Onset of neuronal differentiation  
640 is regulated by paraxial mesoderm and requires attenuation of FGF signalling.  
641 *Development*, *129*(7), 1681.
- 642 Diez del Corral, R., Olivera-Martinez, I., Goriely, A., Gale, E., Maden, M., & Storey, K. (2003).  
643 Opposing FGF and retinoid pathways control ventral neural pattern, neuronal  
644 differentiation, and segmentation during body axis extension. *Neuron*, *40*(1), 65-79.  
645 doi:10.1016/s0896-6273(03)00565-8
- 646 Dobin, A., Davis, C. A., Schlesinger, F., Drenkow, J., Zaleski, C., Jha, S., . . . Gingeras, T. R. (2013).  
647 STAR: ultrafast universal RNA-seq aligner. *Bioinformatics*, *29*(1), 15-21.  
648 doi:10.1093/bioinformatics/bts635
- 649 Edri, S., Hayward, P., Baillie-Johnson, P., Steventon, B. J., & Martinez Arias, A. (2019). An  
650 epiblast stem cell-derived multipotent progenitor population for axial extension.  
651 *Development*, *146*(10), dev168187. doi:10.1242/dev.168187
- 652 Frith, T. J., Granata, I., Wind, M., Stout, E., Thompson, O., Neumann, K., . . . Tsakiridis, A.  
653 (2018). Human axial progenitors generate trunk neural crest cells in vitro. *Elife*, *7*.  
654 doi:10.7554/eLife.35786
- 655 Furthauer, M., Van Celst, J., Thisse, C., & Thisse, B. (2004). Fgf signalling controls the  
656 dorsoventral patterning of the zebrafish embryo. *Development*, *131*(12), 2853-2864.  
657 doi:10.1242/dev.01156
- 658 Gentsch, G. E., Monteiro, R. S., & Smith, J. C. (2017). Cooperation Between T-Box Factors  
659 Regulates the Continuous Segregation of Germ Layers During Vertebrate  
660 Embryogenesis. *Curr Top Dev Biol*, *122*, 117-159. doi:10.1016/bs.ctdb.2016.07.012
- 661 Gomez, G. A., Prasad, M. S., Wong, M., Charney, R. M., Shelar, P. B., Sandhu, N., . . . Garcia-  
662 Castro, M. I. (2019). WNT/beta-catenin modulates the axial identity of embryonic  
663 stem cell-derived human neural crest. *Development*, *146*(16).  
664 doi:10.1242/dev.175604
- 665 Gouti, M., Delile, J., Stamataki, D., Wymeersch, F. J., Huang, Y., Kleinjung, J., . . . Briscoe, J.  
666 (2017). A Gene Regulatory Network Balances Neural and Mesoderm Specification  
667 during Vertebrate Trunk Development. *Dev Cell*, *41*(3), 243-261 e247.  
668 doi:10.1016/j.devcel.2017.04.002
- 669 Gouti, M., Metzis, V., & Briscoe, J. (2015). The route to spinal cord cell types: a tale of signals  
670 and switches. *Trends Genet*, *31*(6), 282-289. doi:10.1016/j.tig.2015.03.001

- 671 Gouti, M., Tsakiridis, A., Wymeersch, F. J., Huang, Y., Kleinjung, J., Wilson, V., & Briscoe, J.  
672 (2014). In vitro generation of neuromesodermal progenitors reveals distinct roles for  
673 wnt signalling in the specification of spinal cord and paraxial mesoderm identity. *PLoS*  
674 *Biol*, *12*(8), e1001937. doi:10.1371/journal.pbio.1001937
- 675 Guo, X., & Wang, X.-F. (2009). Signaling cross-talk between TGF- $\beta$ /BMP and other pathways.  
676 *Cell Research*, *19*(1), 71-88. doi:10.1038/cr.2008.302
- 677 Hackland, J. O. S., Shelar, P. B., Sandhu, N., Prasad, M. S., Charney, R. M., Gomez, G. A., . . .  
678 Garcia-Castro, M. I. (2019). FGF Modulates the Axial Identity of Trunk hPSC-Derived  
679 Neural Crest but Not the Cranial-Trunk Decision. *Stem cell reports*, *12*(5), 920-933.  
680 doi:10.1016/j.stemcr.2019.04.015
- 681 Halder, S. K., Beauchamp, R. D., & Datta, P. K. (2005). A specific inhibitor of TGF-beta receptor  
682 kinase, SB-431542, as a potent antitumor agent for human cancers. *Neoplasia (New*  
683 *York, N.Y.)*, *7*(5), 509-521. doi:10.1593/neo.04640
- 684 Henrique, D., Abranches, E., Verrier, L., & Storey, K. G. (2015). Neuromesodermal progenitors  
685 and the making of the spinal cord. *Development*, *142*(17), 2864-2875.  
686 doi:10.1242/dev.119768
- 687 Hulsen, T., de Vlieg, J., & Alkema, W. (2008). BioVenn - a web application for the comparison  
688 and visualization of biological lists using area-proportional Venn diagrams. *BMC*  
689 *Genomics*, *9*, 488. doi:10.1186/1471-2164-9-488
- 690 Inman, G. J., Nicolas, F. J., Callahan, J. F., Harling, J. D., Gaster, L. M., Reith, A. D., . . . Hill, C. S.  
691 (2002). SB-431542 is a potent and specific inhibitor of transforming growth factor-  
692 beta superfamily type I activin receptor-like kinase (ALK) receptors ALK4, ALK5, and  
693 ALK7. *Mol Pharmacol*, *62*(1), 65-74. doi:10.1124/mol.62.1.65
- 694 Janesick, A., Nguyen, T. T. L., Aisaki, K.-i., Igarashi, K., Kitajima, S., Chandraratna, R. A. S., . . .  
695 Blumberg, B. (2014). Active repression by RAR $\gamma$  signaling is required for vertebrate  
696 axial elongation. *Development*, *141*(11), 2260. doi:10.1242/dev.103705
- 697 Janesick, A., Wu, S. C., & Blumberg, B. (2015). Retinoic acid signaling and neuronal  
698 differentiation. *Cell Mol Life Sci*, *72*(8), 1559-1576. doi:10.1007/s00018-014-1815-9
- 699 Javali, A., Misra, A., Leonavicius, K., Acharyya, D., Vyas, B., & Sambasivan, R. (2017). Co-  
700 expression of Tbx6 and Sox2 identifies a novel transient neuromesoderm progenitor  
701 cell state. *Development*, *144*(24), 4522-4529. doi:10.1242/dev.153262
- 702 Jessell, T. M. (2000). Neuronal specification in the spinal cord: inductive signals and  
703 transcriptional codes. *Nat Rev Genet*, *1*(1), 20-29. doi:10.1038/35049541
- 704 Kadoya, K., Lu, P., Nguyen, K., Lee-Kubli, C., Kumamaru, H., Yao, L., . . . Tuszynski, M. H. (2016).  
705 Spinal cord reconstitution with homologous neural grafts enables robust corticospinal  
706 regeneration. *Nature medicine*, *22*(5), 479-487. doi:10.1038/nm.4066
- 707 Klein, E. S., Pino, M. E., Johnson, A. T., Davies, P. J., Nagpal, S., Thacher, S. M., . . .  
708 Chandraratna, R. A. (1996). Identification and functional separation of retinoic acid  
709 receptor neutral antagonists and inverse agonists. *J Biol Chem*, *271*(37), 22692-22696.  
710 doi:10.1074/jbc.271.37.22692
- 711 Koch, F., Scholze, M., Wittler, L., Schifferl, D., Sudheer, S., Grote, P., . . . Herrmann, B. G. (2017).  
712 Antagonistic Activities of Sox2 and Brachyury Control the Fate Choice of Neuro-  
713 Mesodermal Progenitors. *Dev Cell*, *42*(5), 514-526 e517.  
714 doi:10.1016/j.devcel.2017.07.021
- 715 Koide, T., Downes, M., Chandraratna, R. A., Blumberg, B., & Umesono, K. (2001). Active  
716 repression of RAR signaling is required for head formation. *Genes & development*,  
717 *15*(16), 2111-2121. doi:10.1101/gad.908801

- 718 Kumamaru, H., Kadoya, K., Adler, A. F., Takashima, Y., Graham, L., Coppola, G., & Tuszynski,  
719 M. H. (2018). Generation and post-injury integration of human spinal cord neural stem  
720 cells. *Nat Methods*, *15*(9), 723-731. doi:10.1038/s41592-018-0074-3
- 721 Le Dréau, G., & Martí, E. (2012). Dorsal–ventral patterning of the neural tube: A tale of three  
722 signals. *Developmental Neurobiology*, *72*(12), 1471-1481. doi:10.1002/dneu.22015
- 723 Lee, H., Shamy, G. A., Elkabetz, Y., Schofield, C. M., Harrision, N. L., Panagiotakos, G., . . . Studer,  
724 L. (2007). Directed differentiation and transplantation of human embryonic stem cell-  
725 derived motoneurons. *STEM CELLS*, *25*(8), 1931-1939. doi:10.1634/stemcells.2007-  
726 0097
- 727 Leung, A. W., Murdoch, B., Salem, A. F., Prasad, M. S., Gomez, G. A., & Garcia-Castro, M. I.  
728 (2016). WNT/beta-catenin signaling mediates human neural crest induction via a pre-  
729 neural border intermediate. *Development*, *143*(3), 398-410. doi:10.1242/dev.130849
- 730 Li, B., & Dewey, C. N. (2011). RSEM: accurate transcript quantification from RNA-Seq data with  
731 or without a reference genome. *BMC Bioinformatics*, *12*, 323. doi:10.1186/1471-2105-  
732 12-323
- 733 Li, X., Liu, Z., Qiu, M., & Yang, Z. (2014). Sp8 plays a supplementary role to Pax6 in establishing  
734 the pMN/p3 domain boundary in the spinal cord. *Development*, *141*(14), 2875-2884.  
735 doi:10.1242/dev.105387
- 736 Li, X. J., Du, Z. W., Zarnowska, E. D., Pankratz, M., Hansen, L. O., Pearce, R. A., & Zhang, S. C.  
737 (2005). Specification of motoneurons from human embryonic stem cells. *Nat*  
738 *Biotechnol*, *23*(2), 215-221. doi:10.1038/nbt1063
- 739 Liem, K. F., Jessell, T. M., & Briscoe, J. (2000). Regulation of the neural patterning activity of  
740 sonic hedgehog by secreted BMP inhibitors expressed by notochord and somites.  
741 *Development*, *127*(22), 4855.
- 742 Liem, K. F., Jr., Tremml, G., & Jessell, T. M. (1997). A role for the roof plate and its resident  
743 TGFbeta-related proteins in neuronal patterning in the dorsal spinal cord. *Cell*, *91*(1),  
744 127-138. doi:10.1016/s0092-8674(01)80015-5
- 745 Lippmann, E. S., Williams, C. E., Ruhl, D. A., Estevez-Silva, M. C., Chapman, E. R., Coon, J. J., &  
746 Ashton, R. S. (2015). Deterministic HOX patterning in human pluripotent stem cell-  
747 derived neuroectoderm. *Stem cell reports*, *4*(4), 632-644.  
748 doi:10.1016/j.stemcr.2015.02.018
- 749 Liu, P., Wakamiya, M., Shea, M. J., Albrecht, U., Behringer, R. R., & Bradley, A. (1999).  
750 Requirement for Wnt3 in vertebrate axis formation. *Nat Genet*, *22*(4), 361-365.  
751 doi:10.1038/11932
- 752 Lunn, J. S., Fishwick, K. J., Halley, P. A., & Storey, K. G. (2007). A spatial and temporal map of  
753 FGF/Erk1/2 activity and response repertoires in the early chick embryo. *Dev Biol*,  
754 *302*(2), 536-552. doi:10.1016/j.ydbio.2006.10.014
- 755 Luu, B., Ellisor, D., & Zervas, M. (2011). The Lineage Contribution and Role of Gbx2 in Spinal  
756 Cord Development. *PLoS One*, *6*(6), e20940. doi:10.1371/journal.pone.0020940
- 757 Martin, B. L., & Kimelman, D. (2008). Regulation of canonical Wnt signaling by Brachyury is  
758 essential for posterior mesoderm formation. *Dev Cell*, *15*(1), 121-133.  
759 doi:10.1016/j.devcel.2008.04.013
- 760 Martin, B. L., & Kimelman, D. (2010). Brachyury establishes the embryonic mesodermal  
761 progenitor niche. *Genes & development*, *24*(24), 2778-2783.  
762 doi:10.1101/gad.1962910

- 763 Martin, M. (2011). Cutadapt removes adapter sequences from high-throughput sequencing  
764 reads. *EMBNET Journal*; Vol 17, No 1: Next Generation Sequencing Data Analysis DO -  
765 10.14806/ej.17.1.200.
- 766 Mathis, L., & Nicolas, J. F. (2000). Different clonal dispersion in the rostral and caudal mouse  
767 central nervous system. *Development*, 127(6), 1277.
- 768 Mazzoni, E. O., Mahony, S., Peljto, M., Patel, T., Thornton, S. R., McCuine, S., . . . Wichterle, H.  
769 (2013). Saltatory remodeling of Hox chromatin in response to rostrocaudal patterning  
770 signals. *Nat Neurosci*, 16(9), 1191-1198. doi:10.1038/nn.3490
- 771 Mohlin, S., Kunttas, E., Persson, C. U., Abdel-Haq, R., Castillo, A., Murko, C., . . . Kerosuo, L.  
772 (2019). Maintaining multipotent trunk neural crest stem cells as self-renewing  
773 crestospheres. *Dev Biol*, 447(2), 137-146. doi:10.1016/j.ydbio.2019.01.010
- 774 Nagoshi, N., Tsuji, O., Nakamura, M., & Okano, H. (2019). Cell therapy for spinal cord injury  
775 using induced pluripotent stem cells. *Regenerative therapy*, 11, 75-80.  
776 doi:10.1016/j.reth.2019.05.006
- 777 Neijts, R., Amin, S., van Rooijen, C., & Deschamps, J. (2017). Cdx is crucial for the timing  
778 mechanism driving colinear Hox activation and defines a trunk segment in the Hox  
779 cluster topology. *Dev Biol*, 422(2), 146-154. doi:10.1016/j.ydbio.2016.12.024
- 780 Nichols, J., & Smith, A. (2011). The origin and identity of embryonic stem cells. *Development*,  
781 138(1), 3. doi:10.1242/dev.050831
- 782 Nijssen, J., Comley, L. H., & Hedlund, E. (2017). Motor neuron vulnerability and resistance in  
783 amyotrophic lateral sclerosis. *Acta neuropathologica*, 133(6), 863-885.  
784 doi:10.1007/s00401-017-1708-8
- 785 Olivera-Martinez, I., Schurch, N., Li, R. A., Song, J., Halley, P. A., Das, R. M., . . . Storey, K. G.  
786 (2014). Major transcriptome re-organisation and abrupt changes in signalling, cell  
787 cycle and chromatin regulation at neural differentiation in vivo. *Development*,  
788 141(16), 3266-3276. doi:10.1242/dev.112623
- 789 Olivera-Martinez, I., & Storey, K. G. (2007). Wnt signals provide a timing mechanism for the  
790 FGF-retinoid differentiation switch during vertebrate body axis extension.  
791 *Development*, 134(11), 2125-2135. doi:10.1242/dev.000216
- 792 Peljto, M., Dasen, J. S., Mazzoni, E. O., Jessell, T. M., & Wichterle, H. (2010). Functional  
793 diversity of ESC-derived motor neuron subtypes revealed through intraspinal  
794 transplantation. *Cell Stem Cell*, 7(3), 355-366. doi:10.1016/j.stem.2010.07.013
- 795 Pera, E. M., Ikeda, A., Eivers, E., & De Robertis, E. M. (2003). Integration of IGF, FGF, and anti-  
796 BMP signals via Smad1 phosphorylation in neural induction. *Genes & development*,  
797 17(24), 3023-3028. doi:10.1101/gad.1153603
- 798 Philippidou, P., & Dasen, J. S. (2013). Hox genes: choreographers in neural development,  
799 architects of circuit organization. *Neuron*, 80(1), 12-34.  
800 doi:10.1016/j.neuron.2013.09.020
- 801 Ribes, V., Stutzmann, F., Bianchetti, L., Guillemot, F., Dollé, P., & Le Roux, I. (2008).  
802 Combinatorial signalling controls Neurogenin2 expression at the onset of spinal  
803 neurogenesis. *Developmental Biology*, 321(2), 470-481.  
804 doi:<https://doi.org/10.1016/j.ydbio.2008.06.003>
- 805 Ritchie, M. E., Phipson, B., Wu, D., Hu, Y., Law, C. W., Shi, W., & Smyth, G. K. (2015). limma  
806 powers differential expression analyses for RNA-sequencing and microarray studies.  
807 *Nucleic Acids Res*, 43(7), e47. doi:10.1093/nar/gkv007
- 808 Sakai, Y., Meno, C., Fujii, H., Nishino, J., Shiratori, H., Saijoh, Y., . . . Hamada, H. (2001). The  
809 retinoic acid-inactivating enzyme CYP26 is essential for establishing an uneven

- 810 distribution of retinoic acid along the antero-posterior axis within the mouse embryo.  
811 *Genes & development*, 15(2), 213-225. doi:10.1101/gad.851501
- 812 Sandberg, M., Kallstrom, M., & Muhr, J. (2005). Sox21 promotes the progression of vertebrate  
813 neurogenesis. *Nat Neurosci*, 8(8), 995-1001. doi:10.1038/nn1493
- 814 Sasai, N., Kutejova, E., & Briscoe, J. (2014). Integration of signals along orthogonal axes of the  
815 vertebrate neural tube controls progenitor competence and increases cell diversity.  
816 *PLoS Biol*, 12(7), e1001907. doi:10.1371/journal.pbio.1001907
- 817 Schindelin, J., Arganda-Carreras, I., Frise, E., Kaynig, V., Longair, M., Pietzsch, T., . . . Cardona,  
818 A. (2012). Fiji: an open-source platform for biological-image analysis. *Nature Methods*,  
819 9(7), 676-682. doi:10.1038/nmeth.2019
- 820 Shum, A. S., Poon, L. L., Tang, W. W., Koide, T., Chan, B. W., Leung, Y. C., . . . Copp, A. J. (1999).  
821 Retinoic acid induces down-regulation of Wnt-3a, apoptosis and diversion of tail bud  
822 cells to a neural fate in the mouse embryo. *Mech Dev*, 84(1-2), 17-30.  
823 doi:10.1016/s0925-4773(99)00059-3
- 824 Simoes-Costa, M., & Bronner, M. E. (2015). Establishing neural crest identity: a gene  
825 regulatory recipe. *Development*, 142(2), 242-257. doi:10.1242/dev.105445
- 826 Snyder, E. Y. (2017). The state of the art in stem cell biology and regenerative medicine: the  
827 end of the beginning. *Pediatric Research*, 83(1-2), 191-204. doi:10.1038/pr.2017.258
- 828 Storey, K. G., Goriely, A., Sargent, C. M., Brown, J. M., Burns, H. D., Abud, H. M., & Heath, J. K.  
829 (1998). Early posterior neural tissue is induced by FGF in the chick embryo.  
830 *Development*, 125(3), 473.
- 831 Stuhlmiller, T. J., & Garcia-Castro, M. I. (2012). Current perspectives of the signaling pathways  
832 directing neural crest induction. *Cell Mol Life Sci*, 69(22), 3715-3737.  
833 doi:10.1007/s00018-012-0991-8
- 834 Takada, S., Stark, K. L., Shea, M. J., Vassileva, G., McMahon, J. A., & McMahon, A. P. (1994).  
835 Wnt-3a regulates somite and tailbud formation in the mouse embryo. *Genes &  
836 development*, 8(2), 174-189. doi:10.1101/gad.8.2.174
- 837 Takemoto, T., Uchikawa, M., Kamachi, Y., & Kondoh, H. (2006). Convergence of Wnt and FGF  
838 signals in the genesis of posterior neural plate through activation of the Sox2 enhancer  
839 N-1. *Development*, 133(2), 297-306. doi:10.1242/dev.02196
- 840 Takemoto, T., Uchikawa, M., Yoshida, M., Bell, D. M., Lovell-Badge, R., Papaioannou, V. E., &  
841 Kondoh, H. (2011). Tbx6-dependent Sox2 regulation determines neural or  
842 mesodermal fate in axial stem cells. *Nature*, 470(7334), 394-398.  
843 doi:10.1038/nature09729
- 844 Thaler, J. P., Lee, S.-K., Jurata, L. W., Gill, G. N., & Pfaff, S. L. (2002). LIM Factor Lhx3  
845 Contributes to the Specification of Motor Neuron and Interneuron Identity through  
846 Cell-Type-Specific Protein-Protein Interactions. *Cell*, 110(2), 237-249.  
847 doi:10.1016/S0092-8674(02)00823-1
- 848 Trawczynski, M., Liu, G., David, B. T., & Fessler, R. G. (2019). Restoring Motor Neurons in Spinal  
849 Cord Injury With Induced Pluripotent Stem Cells. *Front Cell Neurosci*, 13, 369.  
850 doi:10.3389/fncel.2019.00369
- 851 Tsakiridis, A., Huang, Y., Blin, G., Skylaki, S., Wymeersch, F., Osorno, R., . . . Wilson, V. (2014).  
852 Distinct Wnt-driven primitive streak-like populations reflect in vivo lineage precursors.  
853 *Development*, 141(6), 1209-1221. doi:10.1242/dev.101014
- 854 Turner, D. A., Hayward, P. C., Baillie-Johnson, P., Rue, P., Broome, R., Faunes, F., & Martinez  
855 Arias, A. (2014). Wnt/beta-catenin and FGF signalling direct the specification and

856 maintenance of a neuromesodermal axial progenitor in ensembles of mouse  
857 embryonic stem cells. *Development*, 141(22), 4243-4253. doi:10.1242/dev.112979  
858 Tzouanacou, E., Wegener, A., Wymeersch, F. J., Wilson, V., & Nicolas, J. F. (2009). Redefining  
859 the progression of lineage segregations during mammalian embryogenesis by clonal  
860 analysis. *Dev Cell*, 17(3), 365-376. doi:10.1016/j.devcel.2009.08.002  
861 van de Ven, C., Bialecka, M., Neijts, R., Young, T., Rowland, J. E., Stringer, E. J., . . . Deschamps,  
862 J. (2011). Concerted involvement of Cdx/Hox genes and Wnt signaling in  
863 morphogenesis of the caudal neural tube and cloacal derivatives from the posterior  
864 growth zone. *Development*, 138(16), 3451-3462. doi:10.1242/dev.066118  
865 van den Akker, E., Forlani, S., Chawengsaksophak, K., de Graaff, W., Beck, F., Meyer, B. I., &  
866 Deschamps, J. (2002). Cdx1 and Cdx2 have overlapping functions in anteroposterior  
867 patterning and posterior axis elongation. *Development*, 129(9), 2181.  
868 Verrier, L., Davidson, L., Gierlinski, M., Dady, A., & Storey, K. G. (2018). Neural differentiation,  
869 selection and transcriptomic profiling of human neuromesodermal progenitor-like  
870 cells in vitro. *Development*, 145(16). doi:10.1242/dev.166215  
871 Wang, H., Li, D., Zhai, Z., Zhang, X., Huang, W., Chen, X., . . . Li, W. (2019). Characterization  
872 and Therapeutic Application of Mesenchymal Stem Cells with Neuromesodermal  
873 Origin from Human Pluripotent Stem Cells. *Theranostics*, 9(6), 1683-1697.  
874 doi:10.7150/thno.30487  
875 Wichterle, H., Lieberam, I., Porter, J. A., & Jessell, T. M. (2002). Directed Differentiation of  
876 Embryonic Stem Cells into Motor Neurons. *Cell*, 110(3), 385-397.  
877 doi:[https://doi.org/10.1016/S0092-8674\(02\)00835-8](https://doi.org/10.1016/S0092-8674(02)00835-8)  
878 Wilson, V., Olivera-Martinez, I., & Storey, K. G. (2009). Stem cells, signals and vertebrate body  
879 axis extension. *Development*, 136(10), 1591-1604. doi:10.1242/dev.021246  
880 Wymeersch, F. J., Huang, Y., Blin, G., Cambray, N., Wilkie, R., Wong, F. C., & Wilson, V. (2016).  
881 Position-dependent plasticity of distinct progenitor types in the primitive streak. *Elife*,  
882 5, e10042. doi:10.7554/eLife.10042  
883 Yamaguchi, T. P., Takada, S., Yoshikawa, Y., Wu, N., & McMahon, A. P. (1999). T (Brachyury)  
884 is a direct target of Wnt3a during paraxial mesoderm specification. *Genes &*  
885 *development*, 13(24), 3185-3190. doi:10.1101/gad.13.24.3185  
886  
887  
888  
889  
890  
891  
892  
893



894 **FIGURES**

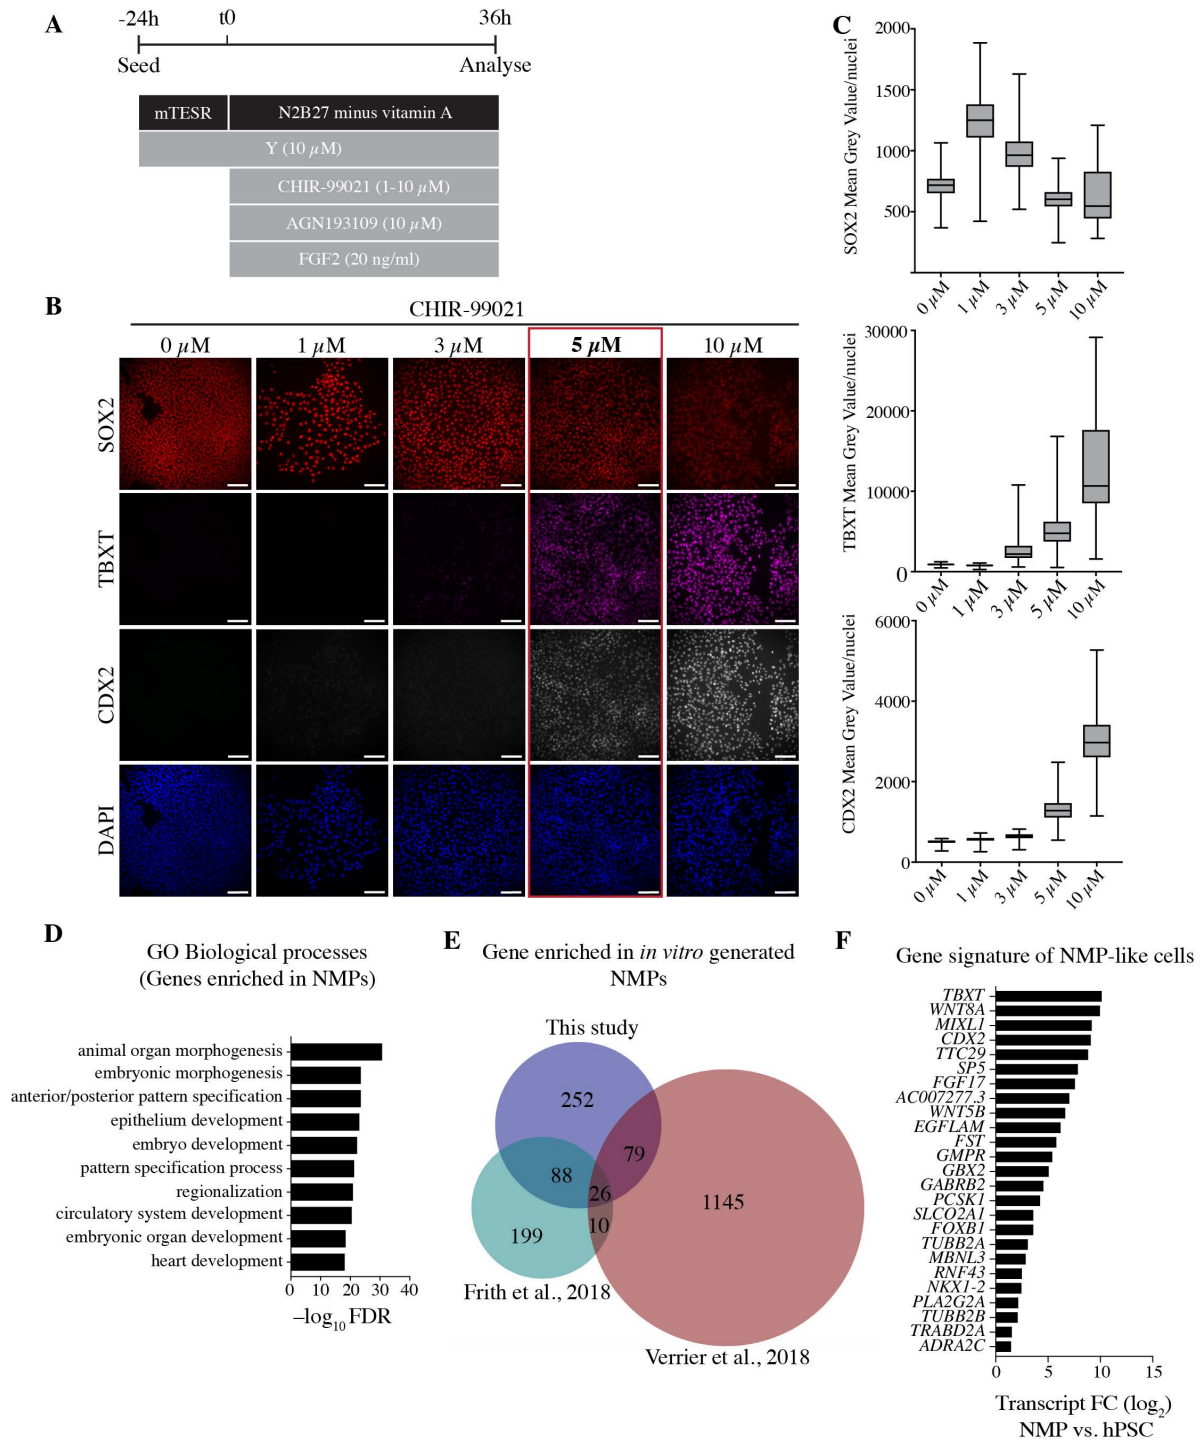

895 **Figure 1: NMP-like cells are induced by intermediate Wnt signalling in the presence of**  
 896 **inhibited RA signalling.**

897 A) Tissue culture scheme for optimising NMP generation from hPSCs. hPSCs are plated 24h before  
 898 exposure to FGF2 (20ng/ml), CHIR-99021 (0-10  $\mu$ M), AGN193109 (10  $\mu$ M) and Y-27632 (10  $\mu$ M) for  
 899 36h. B) Representative immunostaining of 36h cultures treated as shown in (A), showing characteristic  
 900 NMP markers SOX2 (red), TBXT (magenta), CDX2 (grey) and the nuclear stain DAPI (blue) under

901 different CHIR-99021 concentrations. Scale bars, 100  $\mu$ m. C) Box-plots showing mean grey  
902 value/nuclei quantified from repeat experiments as shown in (B). Each plot show data points collected  
903 from 2-4 experiments (>200 nuclei). D) Biological process GO analysis for genes significantly  
904 upregulated in NMPs compared to pluripotent hESCs. The top 10 biological process terms with the  
905 corresponding Benjamini and Hochberg adjusted p-values (FDR) are shown. E) Venn diagram showing  
906 the overlap of significantly upregulated genes in NMPs as reported in this study, Frith et al., (2018)  
907 and Verrier et al., (2018). F) Graph showing transcriptional fold change (FC) within the dataset of this  
908 study, of 26 genes commonly upregulated in NMPs according to Venn diagram in (E).

909  
910  
911  
912  
913  
914  
915  
916  
917  
918  
919  
920  
921  
922  
923  
924  
925  
926  
927  
928  
929  
930  
931  
932  
933  
934  
935  
936

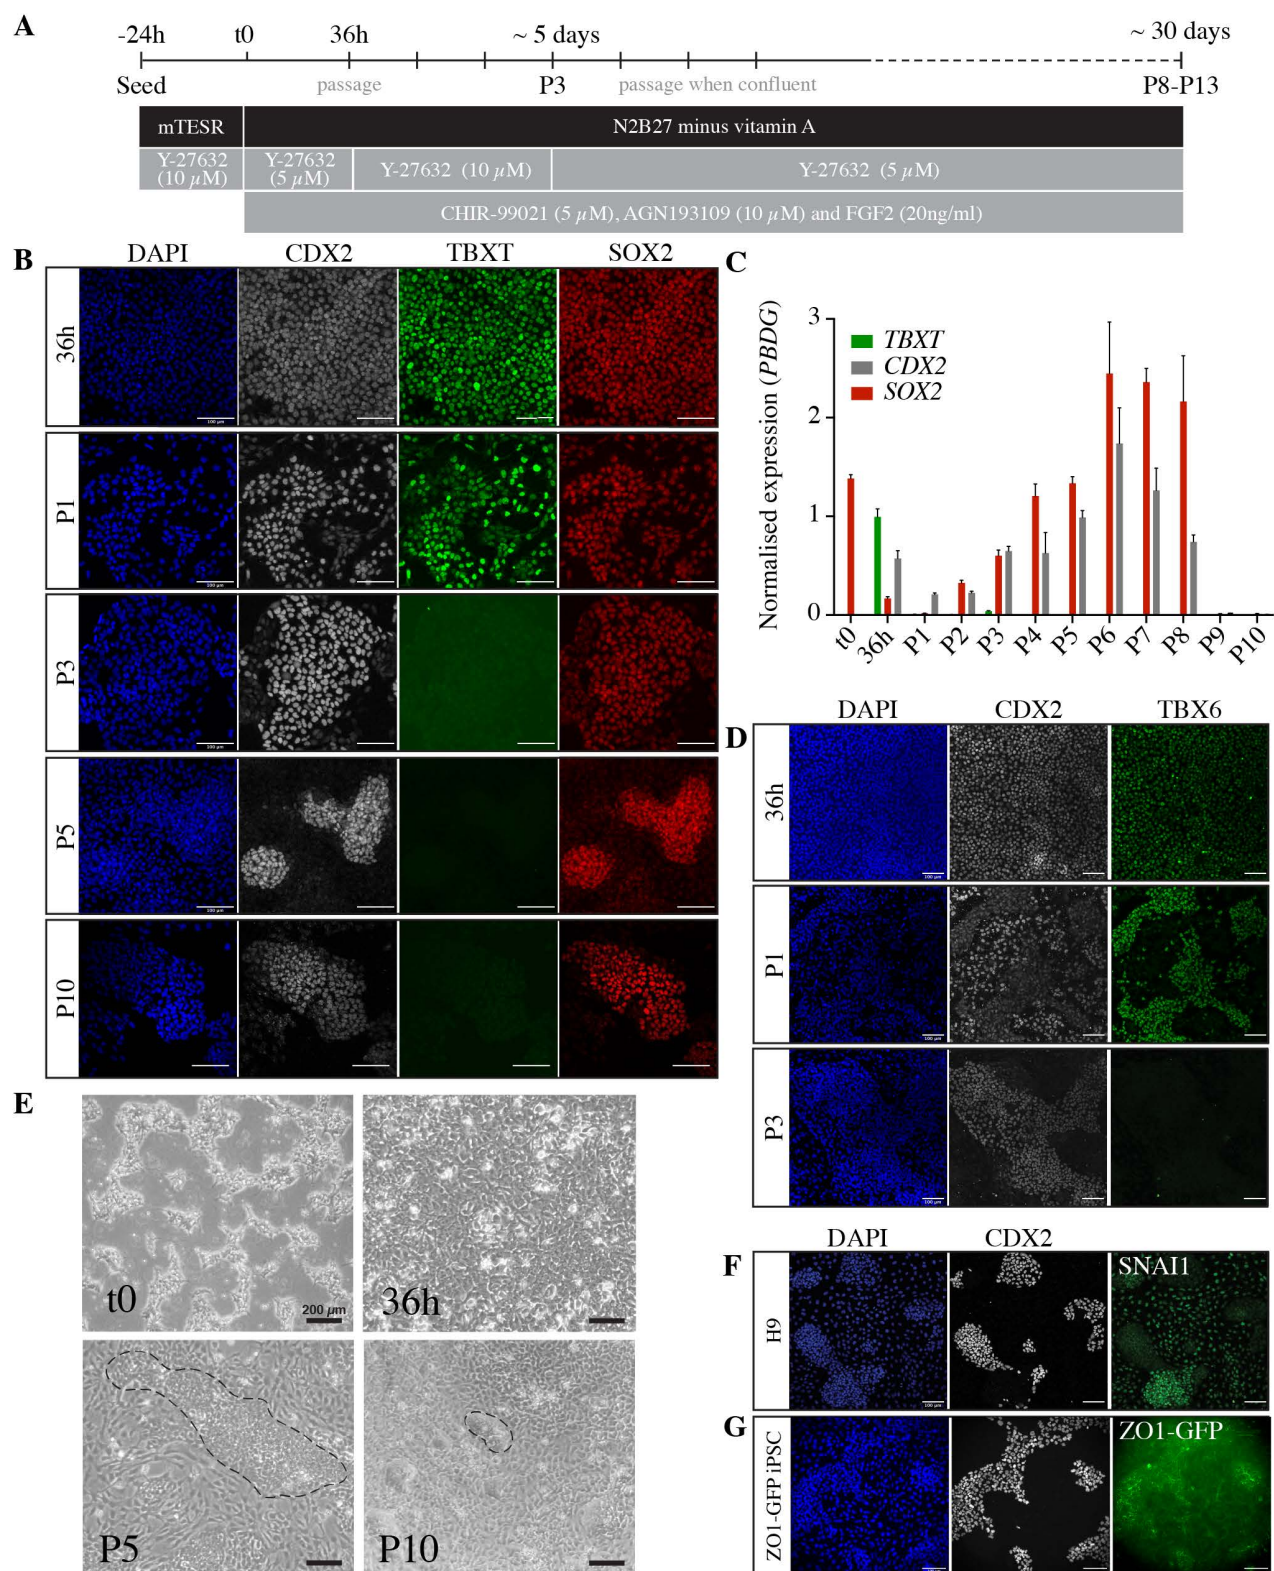

937 **Figure 2: Long term culture of NMPs in the presence of Wnt/FGF and inhibited RA signalling**  
 938 **generates epithelial SOX2<sup>+</sup>/CDX2<sup>+</sup> cell colonies.**

939 A) Tissue culture scheme for generating NMPs and maintaining neural progenitors *in vitro*. Cells are  
 940 passaged at 36h and subsequently passaged at 80-90% confluency for up to 13 passages in FGF2  
 941 (20ng/ml), CHIR-99021 (5 μM), AGN193109 (10 μM) and Y-27632 (10 or 5 μM). B) Representative

942 immunostaining of CDX2 (grey), TBXT (magenta), SOX2 (red) and nuclear stain DAPI (blue) at increasing  
943 stages of tissue culture (36h, passage (P)1, P3, P5 and P10). Scale bars, 100  $\mu$ m. C) Transcriptional  
944 analysis (RT-qPCR) of NMP markers at each passage up to passage 10. Expression levels are normalised  
945 to the reference gene *PBDG*. Error bars show SD, (n=3 technical replicates). Data are representative of  
946 three independent experiments, biological replicates provided in Figure 2 - figure supplement 1A,B.  
947 D) Representative immunostaining of TBX6 (green), CDX2 (grey) and nuclear stain DAPI (blue) at 36h,  
948 P1 and P3. Scale bar, 100  $\mu$ m. E) Representative brightfield images of cells at the indicated stages.  
949 Dashed lines in P5 and P10 outline examples of a compact epithelial colonies, which are surrounded  
950 by flat mesenchymal cells. Scale bar, 200  $\mu$ m. F) Representative immunostaining of CDX2 (grey), SNAI1  
951 (green) and the nuclear stain DAPI (blue) at passage 5. Scale bar, 100  $\mu$ m. G) Representative  
952 immunostaining of CDX2 (grey), GFP (ZO1-mEGFP iPSC, green) and the nuclear stain DAPI (blue) at  
953 passage 5. Scale bar, 100  $\mu$ m.

954

955

956

957

958

959

960

961

962

963

964

965

966

967

968

969

970

971

972

973

974

975

976

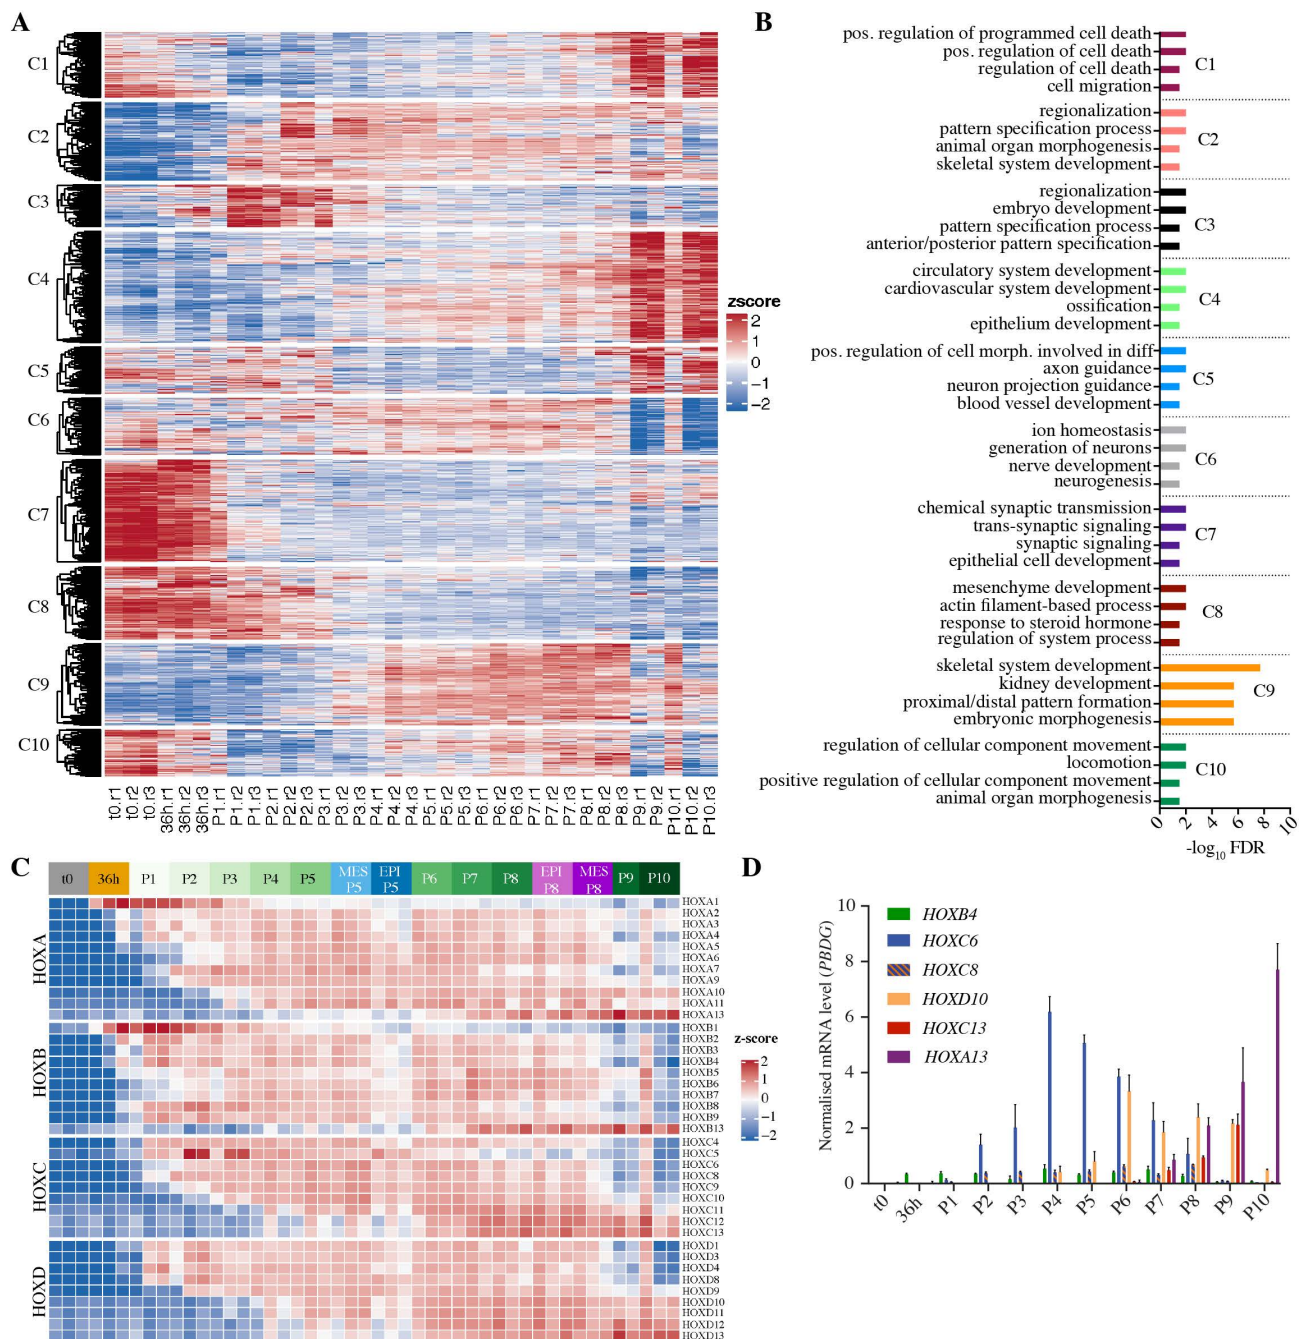

977 **Figure 3: RNA-Seq analysis indicates NMPs transition to neural progenitors and neural crest**  
 978 **derivatives.**

979 A) Heatmap showing dynamically expressed genes (z-score) sorted into 10 clusters (C1-10) using k-  
 980 means hierarchical clustering. Each cluster represents a different temporal expression pattern. B)  
 981 Biological processes GO analysis for gene sets in each cluster shown in (A). The corresponding  
 982 Benjamini and Hochberg adjusted p-values (FDR) are shown. C) Heatmap of expressed HOX(A-D)  
 983 genes (z-score) across each time point including enriched epithelial (EPI) and mesenchymal (MES)  
 984 samples at P5 and P8. D) Transcript levels of selected HOX genes as measured by RT-qPCR. Expression  
 985 level was normalised to the reference gene *PBGD*. Error bars show SD, (n=3 technical replicates). Data  
 986 are representative of three independent experiments, replicates provided in Figure 3 - figure  
 987 supplement 2A,B.

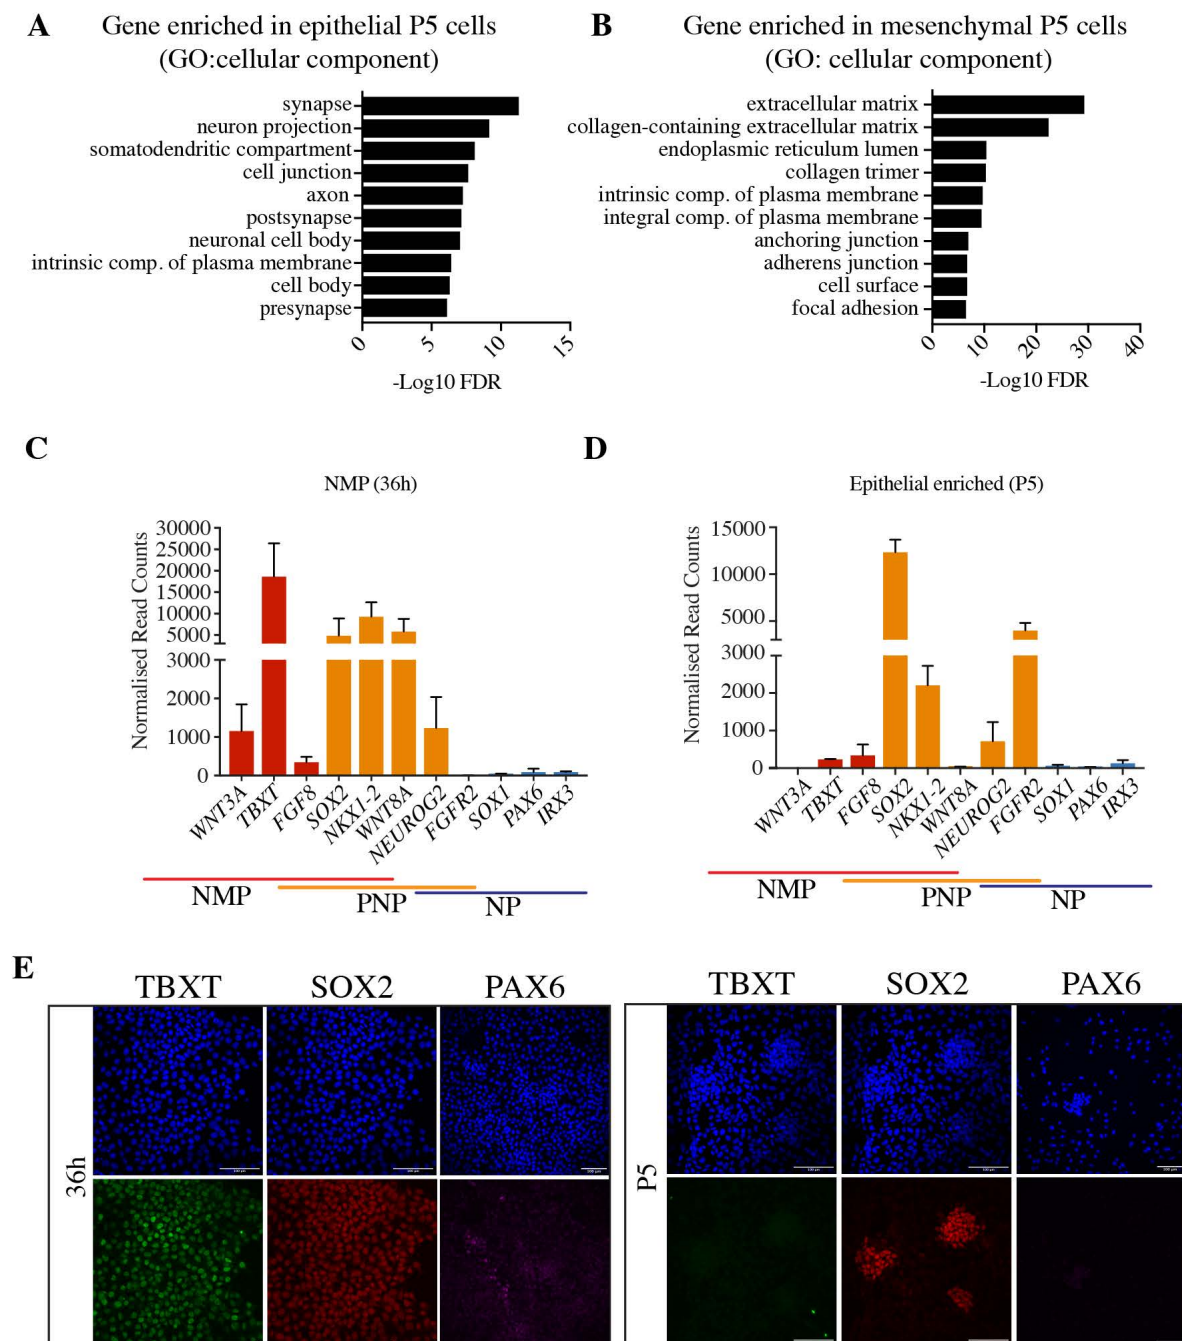

988 **Figure 4: NMP-derived cells stabilise as epithelial pre-neural progenitors.**

989 A,B) Graphs showing cellular component GO analysis for differentially expressed genes in P5 epithelial  
 990 samples (A) and P5 mesenchymal samples (B). The corresponding Benjamini and Hochberg adjusted  
 991 p-values (FDR) are shown. C, D) Normalised expression levels of known markers of NMPs (*WNT3A*,  
 992 *TBXT*, *FGF8*, *SOX2*, *NKX1-2* and *WNT8A/C*), PNP (*SOX2*, *NKX1-2*, *WNT8A/C*, *NEUROG2* and *FGFR2*) and  
 993 NPs (*PAX6*, *IRX3*, *FGFR2*, *NEUROG2* and *SOX1*) at 36h (C) and in P5 epithelial colonies (D) as determined  
 994 by RNA-seq. Error bars show SEM (n = 3 biological replicates). E) Representative immunostaining of  
 995 TBXT (green), SOX2 (red) and PAX6 (magenta) confirming the expression patterns shown in (A and B).  
 996 Scale bars, 100  $\mu$ m.  
 997

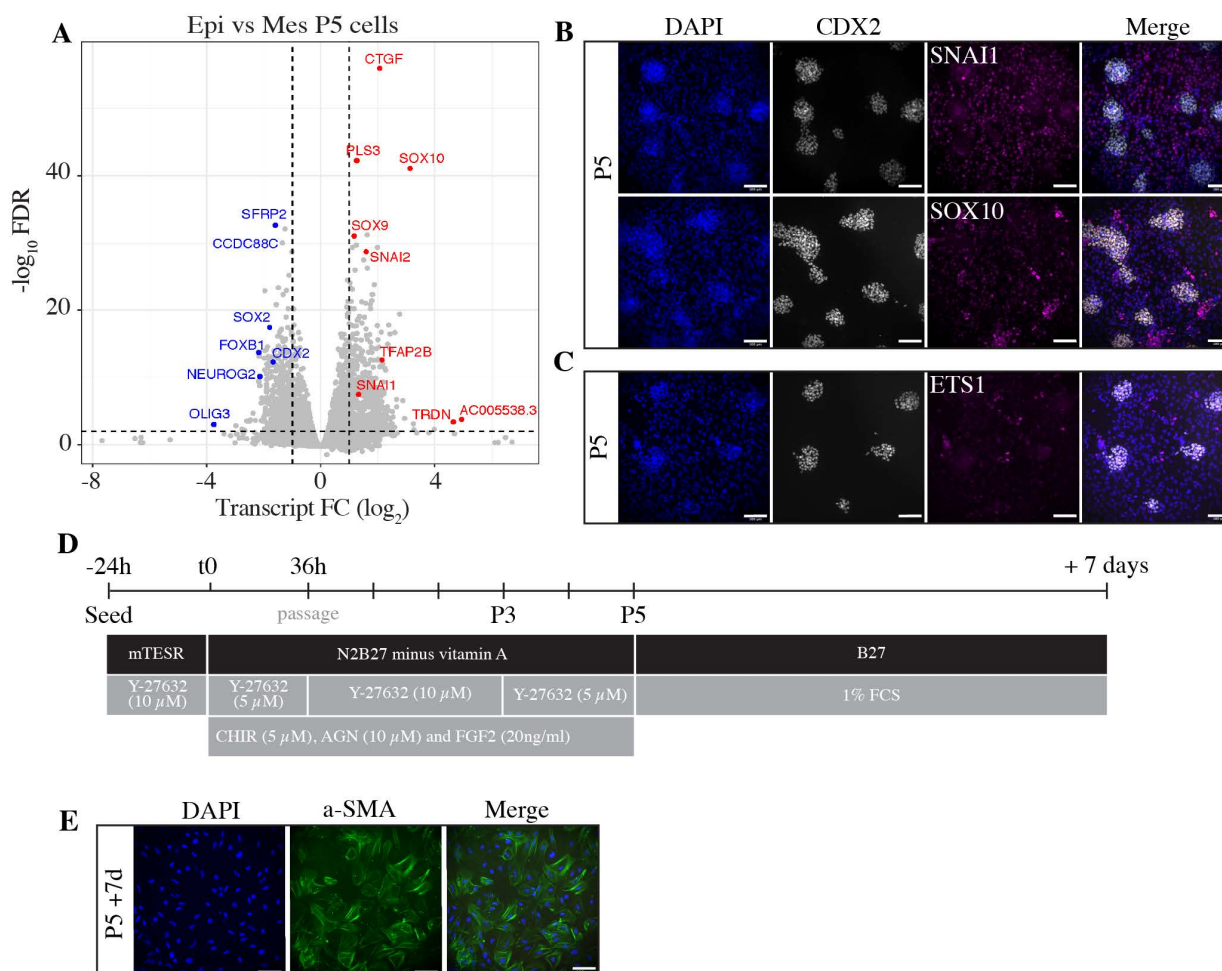

998 **Figure 5: Mesenchymal cells have a neural crest identity.**

999 A) Volcano plot showing differential expression between epithelial and mesenchymal cell at P5.  
 1000 Significant genes are highlighted in blue (epithelial) and red (mesenchymal). (B,C) Representative  
 1001 immunostaining of neural crest markers SNAI1, SOX10 (B) and ETS1 (C), co-stained with epithelial PNP  
 1002 marker CDX2 (grey) and the nuclear stain DAPI (blue). Scale bar, 100  $\mu$ m. D) Scheme for generating  
 1003 NMP/PNP-derived neural crest derivative smooth muscle. E) Representative immunostaining of  $\alpha$ -  
 1004 SMA (green) and nuclear stain DAPI (blue) in NMP/PNP-derived vasculature smooth muscle cells. Scale  
 1005 bar, 100  $\mu$ m.  
 1006

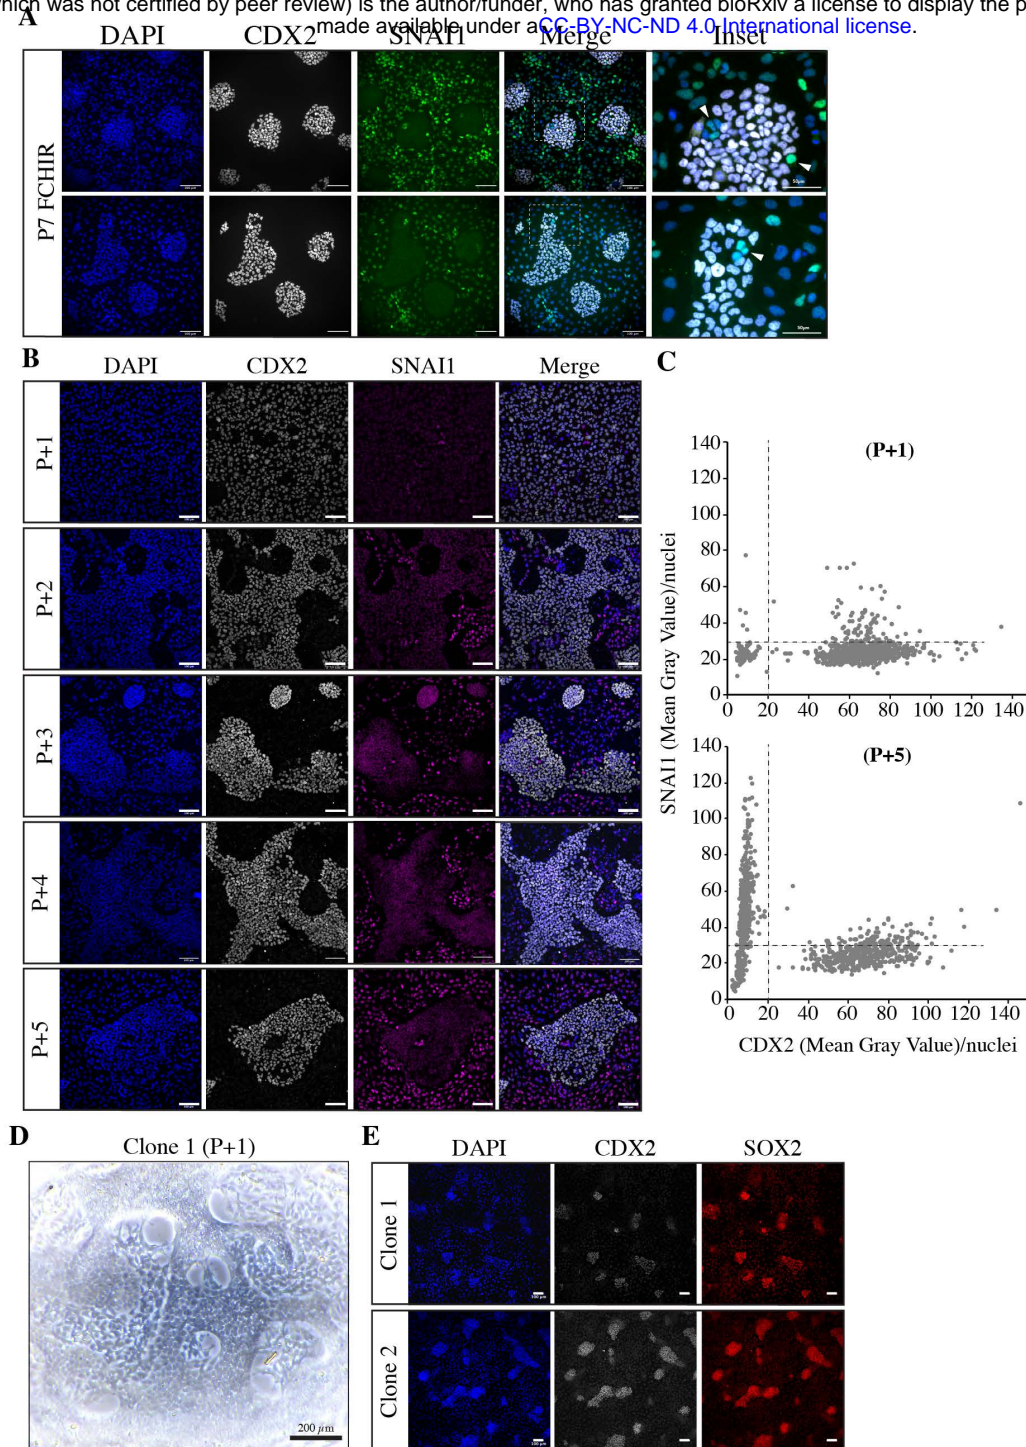

1007 **Figure 6: Epithelial PNPs give rise to migratory neural crest cells.**

1008 A) Representative immunostaining of CDX2 (grey) and SNAI1 (green) co-stained with nuclear stain  
 1009 DAPI (blue) in P7 PNP/NC cultures. Inset shows magnified region identified by white dashed line and  
 1010 arrow marks examples of CDX2/SOX2/SNAI1<sup>+</sup> nuclei within PNP clusters. Scale bars, 100µm or 50 µm  
 1011 (inset). B) Representative immunostaining of CDX2 (grey), SNAI1 (magenta) and nuclear stain DAPI  
 1012 (blue) in epithelial P5 cells which were serially passaged for four passages (P+1 to p+4) following  
 1013 selective detachment enrichment. (C) Dot plot showing the mean grey value/nuclei of CDX2 and SNAI1  
 1014 at P+1 and P+4 panels shown in (B). Each graph shows >900 nuclei. D) Representative bright-field  
 1015 image of a sub-clone generated from the epithelial enriched fragment after 1 passage. Scale bar, 200  
 1016 µm E) Representative immunostaining analysis of CDX2 (grey), SOX2 (red) and nuclear stain DAPI  
 1017 (blue) in two independent sub-clones generated from the epithelial enriched samples after serial 4  
 1018 passages. Scale bar, 100 µm.



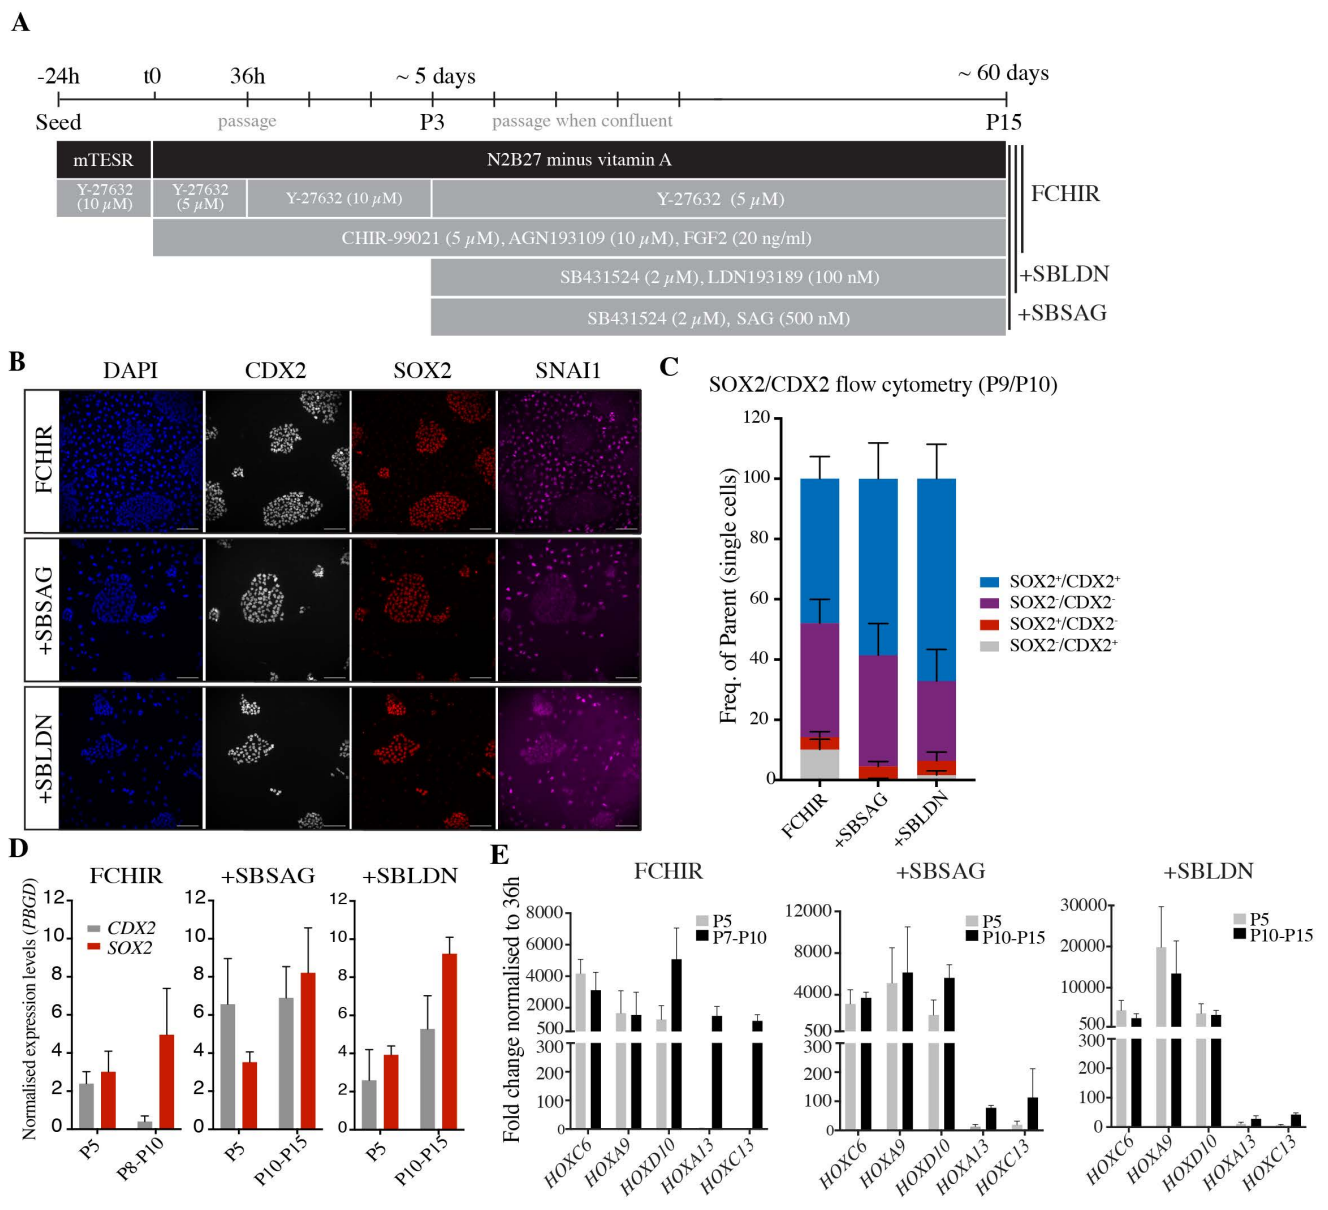

1019 **Figure 7: Modulation of TGF- $\beta$  and SHH signalling locks in A/P information.**

1020 A) Scheme for generating and maintaining PNPs. At passage 3 either SB and LDN (+SB/LDN) were  
 1021 added, or SB and SAG (+SB/SAG) were added to the standard medium (FCHIR). B) Representative  
 1022 immunostaining of P5 cells for CDX2 (grey), SOX2 (red) and SNAI1 (magenta) under conditions  
 1023 indicated in (A). Scale bar, 100  $\mu$ M. C) SOX2/CDX2 flow cytometry analysis of FCHIR (P7) and +SB/LDN  
 1024 and +SB/SAG (P10) samples. Cells were analysed using SOX2 and CDX2 conjugated antibodies and  
 1025 plotted as percentage of expression. Error bars show mean with SEM (n = 3). D) Transcriptional  
 1026 quantification (RT-qPCR) of CDX2 and SOX2 at early (P5) and later passages (FCHIR; P8-P10 and  
 1027 +SB/LDN and +SB/SAG; P10-P15). Expression levels normalised to the reference gene *PBGD*. Error  
 1028 bars show SEM (n = 2-5). E) Graphs showing the transcriptional quantification (RT-qPCR) of selected  
 1029 *HOX* genes at early (P5) and late passages (FCHIR; P8-P10 and +SB/LDN and +SB/SAG; P10-P15) in all  
 1030 conditions tested as indicated in (A). Expression levels are presented as fold change over the 36h  
 1031 time point and were normalised to the reference gene *PBGD*. Error bars show mean with SEM (n = 2/3).

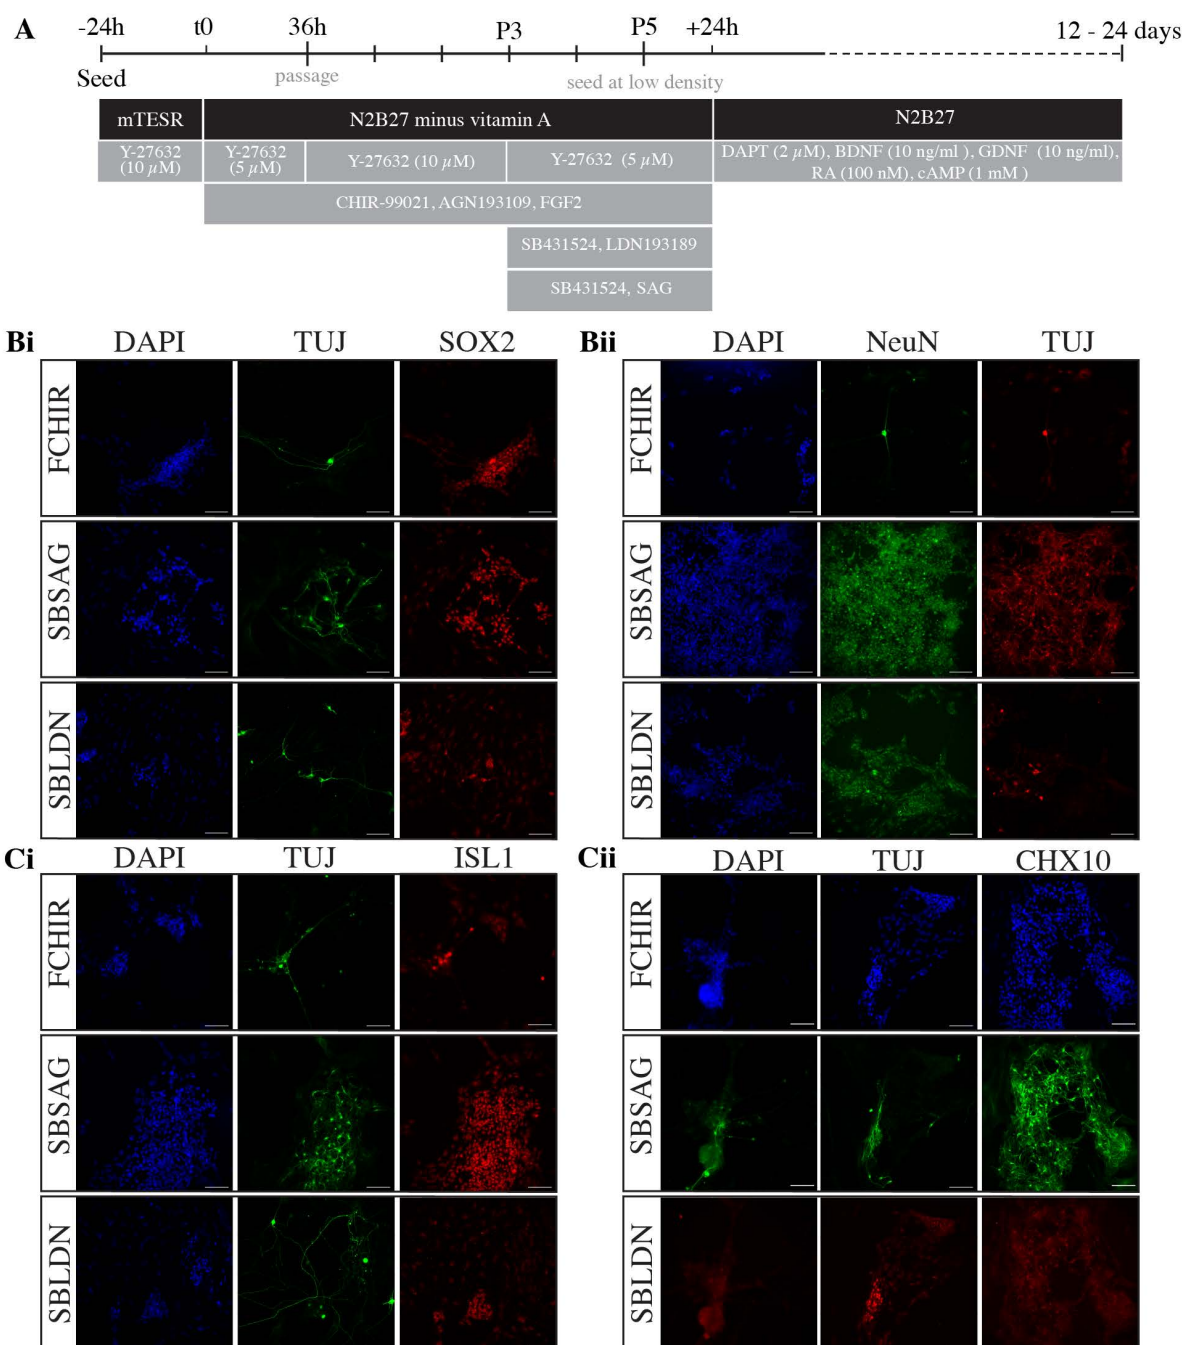

1032 **Figure 8: PNP can be differentiated into neural derivatives and ventralised by SHH.**

1033 A) Scheme for generating differentiated neuronal cultures. Cells are grown until P5, dissociated and  
 1034 plated at low density and then exposed to neural inducing factors shown. B) Representative  
 1035 immunostaining of differentiated neuronal cultures showing (Bi) neuronal nuclei (NeuN, green) and  
 1036  $\beta$ III-tubulin (TUJ, red) or (Bii) SOX2 (green) and  $\beta$ III-tubulin (TUJ, red). Nuclei were stained with DAPI  
 1037 (blue). Scale bars, 100 $\mu$ m. C) Representative immunostaining of ventral neurons stained with ISL1  
 1038 (red, Ci) and CHX10 (red, Cii) paired with  $\beta$ III-tubulin (TUJ, green) and nuclear stain DAPI (blue). Scale  
 1039 bars, 100 $\mu$ m.

1040

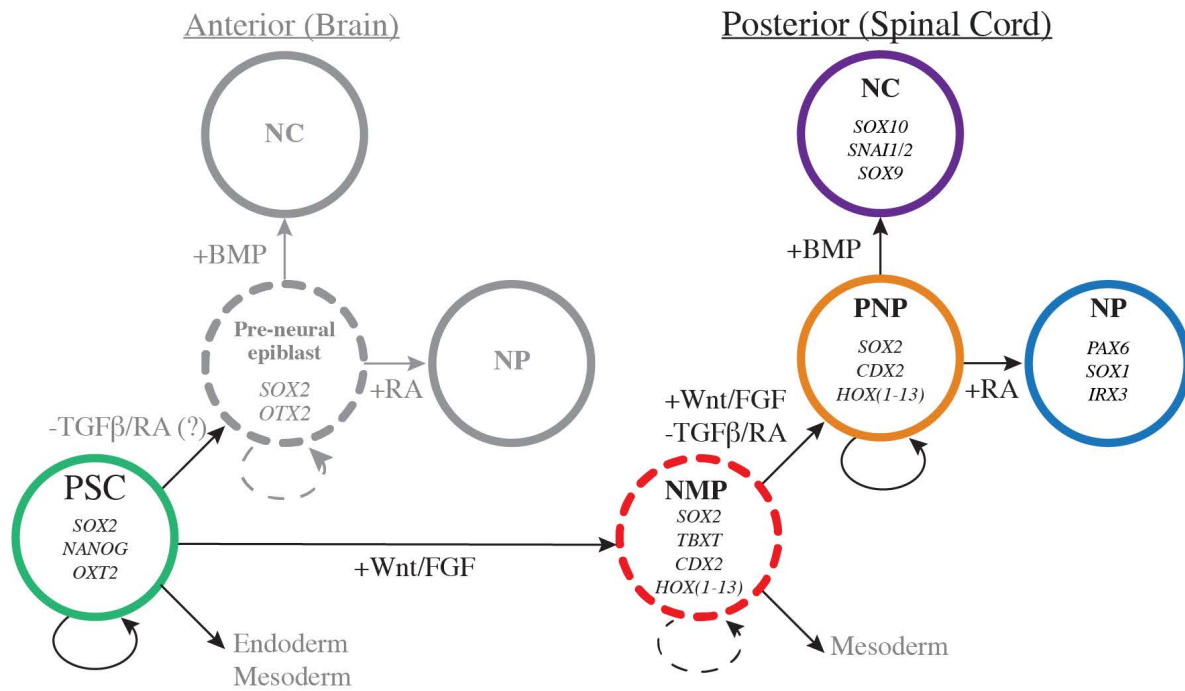

1041 **Figure 9: NMP-derived PNPs self-renew, give rise to trunk NC or can be differentiated to neurons.**

1042 Diagrammatic model summarising the generation of anterior (brain) and posterior (spinal cord) neural  
 1043 progenitors *in vitro*. When treated with inhibitors of TGFβ signalling pluripotent stem cells (PSC) in the  
 1044 give rise to a transient pre-neural epiblast state, which in turn give rise to anterior neural crest (NC)  
 1045 and neural progenitors (NP) of the brain. Neuromesodermal progenitors (NMP), which give rise to  
 1046 posterior neural tissue, are generated from PSC in response to Wnt/FGF signalling. In the absence of  
 1047 RA and TGFβ signalling, NMPs differentiate to a stable pre-neural progenitor (PNP) intermediate which  
 1048 are able to self-renew and give rise to neural progenitors when subjected to RA or neural crest in the  
 1049 presence of BMP. Transient cell states are shown using dotted lines and cells with self-renewal  
 1050 capacity are shown with curved arrows.

1051

1052

1053

1054

1055

1056 SUPPLEMENTARY FIGURES

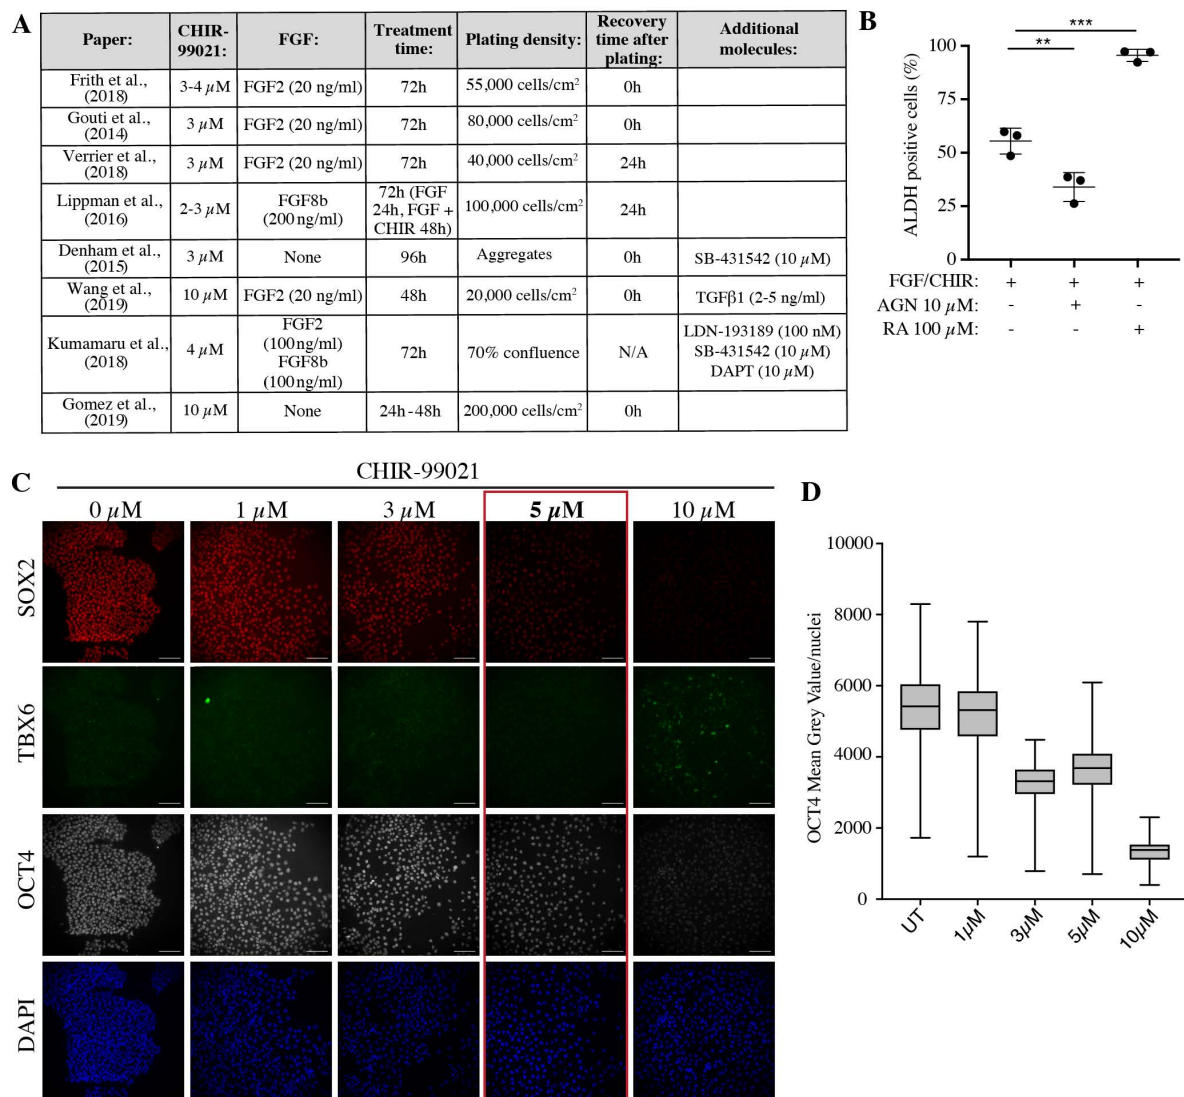

1057 **Figure 1 – figure supplement 1: NMP-like cells are induced by combined Wnt/FGF and inhibited RA**  
 1058 **signalling.**

1059 A) Summary of protocols used in recent studies to generate NMP-like cells from hPSCs. Table includes  
 1060 plating density and recovery time after plating, as well as the exogenous molecules and treatment  
 1061 time used. B) ALDEFLUOR assay was used to measure the expression of aldehyde dehydrogenases  
 1062 (ALDH) in 36h samples generated in three conditions: 1) FGF2 and CHIR only, 2) FGF, CHIR and AGN or  
 1063 3) FGF, CHIR and RA. Samples were analysed using flow cytometry and results were presented as the  
 1064 percentage of cells expressing ALDH. Error bars show SD (n = 3 experiments). \*\*P < 0.01, \*\*\*P < 0.001  
 1065 (ANOVA). C) Representative immunostaining SOX2 (red), TBX6 (green) OCT4 (grey) and the nuclear  
 1066 stain DAPI (blue) after 36h treatment following scheme as shown in Figure 1A with 0  $\mu$ M, 1  $\mu$ M, 3  $\mu$ M,  
 1067 5  $\mu$ M and 10  $\mu$ M CHIR-99021. Scale bars, 100  $\mu$ m. D) Box-plot showing mean grey value/nuclei  
 1068 quantified from repeat experiments as shown in (C). Plot show data points collected from 2  
 1069 experiments (>450 nuclei/experiment).

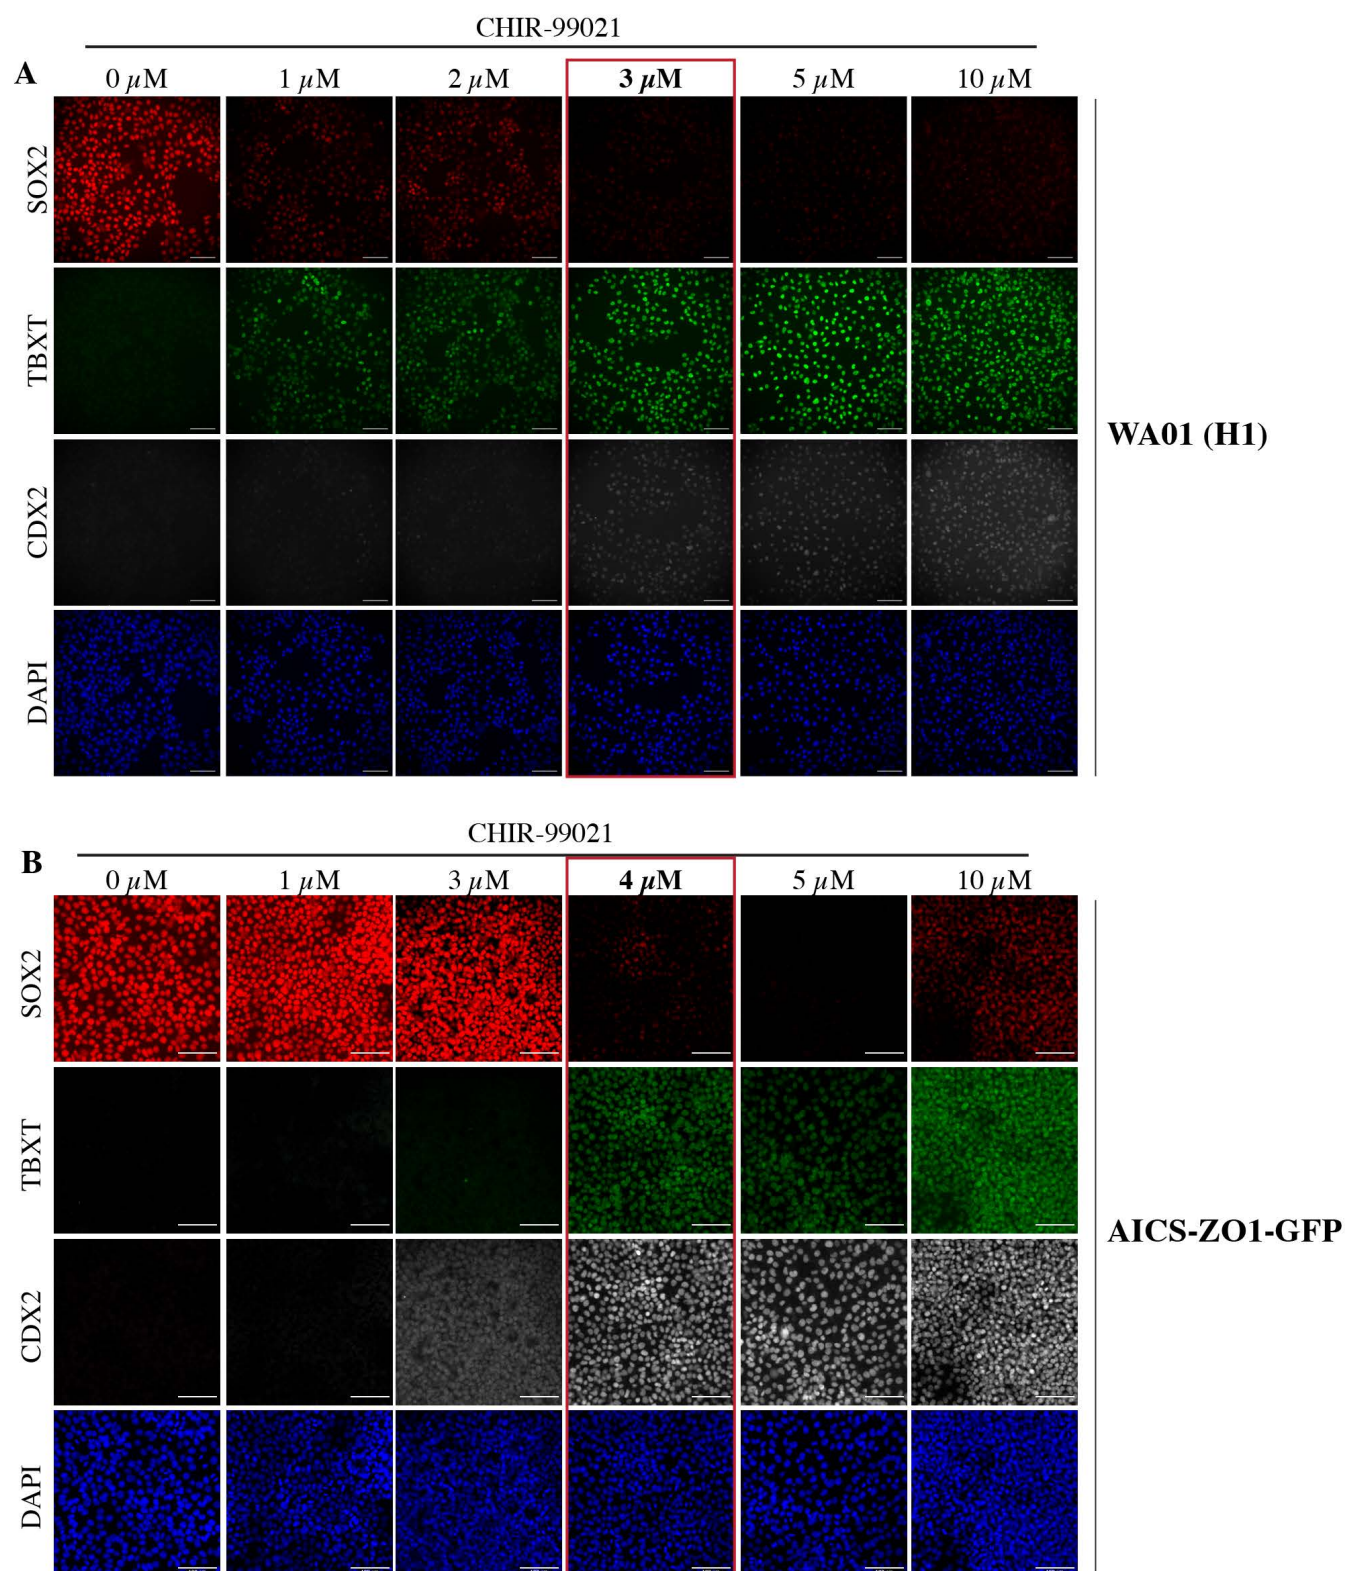

1070 **Figure 1 – figure supplement 2: Generation of NMP-like cells in multiple hPSC lines requires**  
1071 **modulation of the Wnt pathway.**

1072 A, B) Optimal CHIR concentration was optimised for WA01 (H1) hESCs (A) and AICS ZO1-mEGFP (AICS-  
1073 0024) iPSCs (B). Representative immunostaining of NMP markers SOX2 (red) and CDX2 (grey) and TBXT  
1074 (green) at 36h after following treatment scheme shown in Figure 1A, with a range of CHIR  
1075 concentrations between 1-10  $\mu$ M. Scale bars, 100 $\mu$ m.

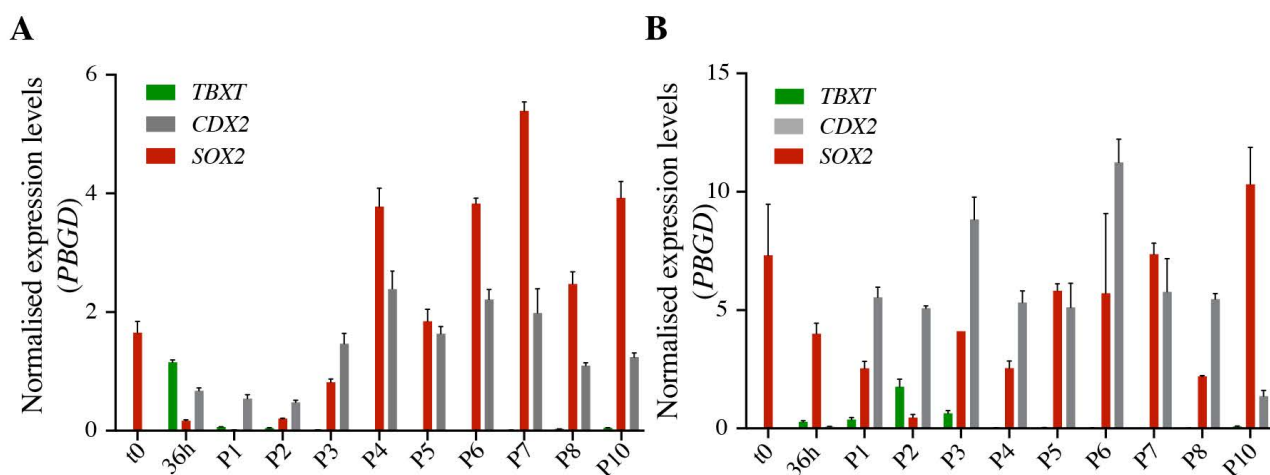

1076 **Figure 2 – figure supplement 1: CDX2 and SOX2 expression can be maintained for 10 passages.**

1077 A,B) Transcriptional analysis (RT-qPCR) of two independent experiments showing NMP markers *TBXT*,  
1078 *SOX2* and *CDX2* at each passage, up to passage 10. Expression levels are normalised to the reference  
1079 gene *PBDG*. Error bars show SD, (n=3 technical replicates).

1080

1081

1082

1083

1084

1085

1086

1087

1088

1089

1090

1091

1092

1093

1094

1095

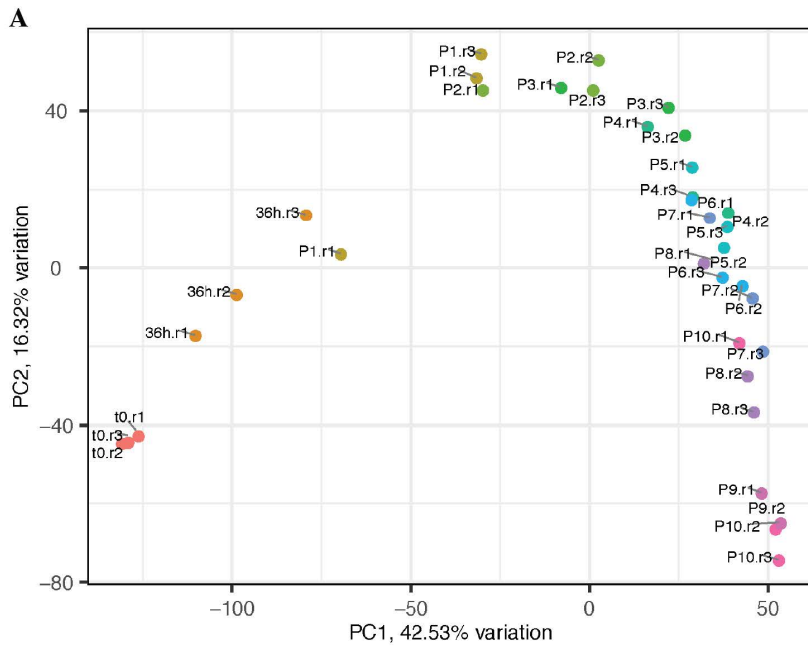

1096 **Figure 3 – figure supplement 1: Principle component analysis of RNA-Seq samples collected over**  
 1097 **passaging.**

1098 A) PCA analysis show biological replicates for each passage cluster together and show small biological  
 1099 variation between experiments  
 1100

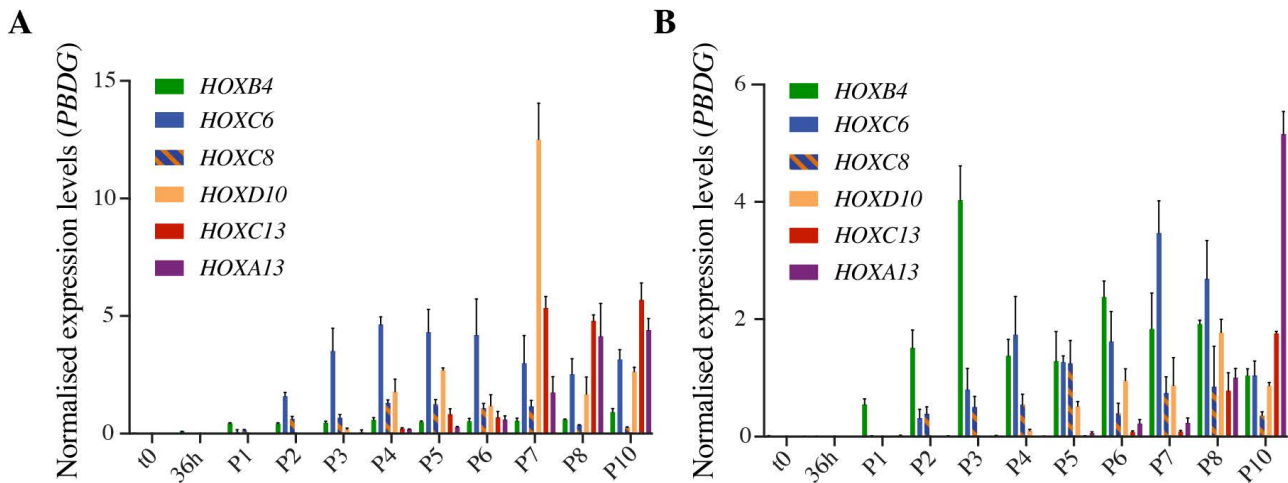

1101 **Figure 3 – figure supplement 2: Full collinear expression of the HOX gene cluster occurs over 10**  
 1102 **passages.**

1103 A,B) Transcriptional analysis (RT-qPCR) of two independent experiments showing selected HOX genes  
 1104 at each passage up to passage 10. Expression levels are normalised to the reference gene *PBDG*. Error  
 1105 bars show SD, (n=3 technical replicates).

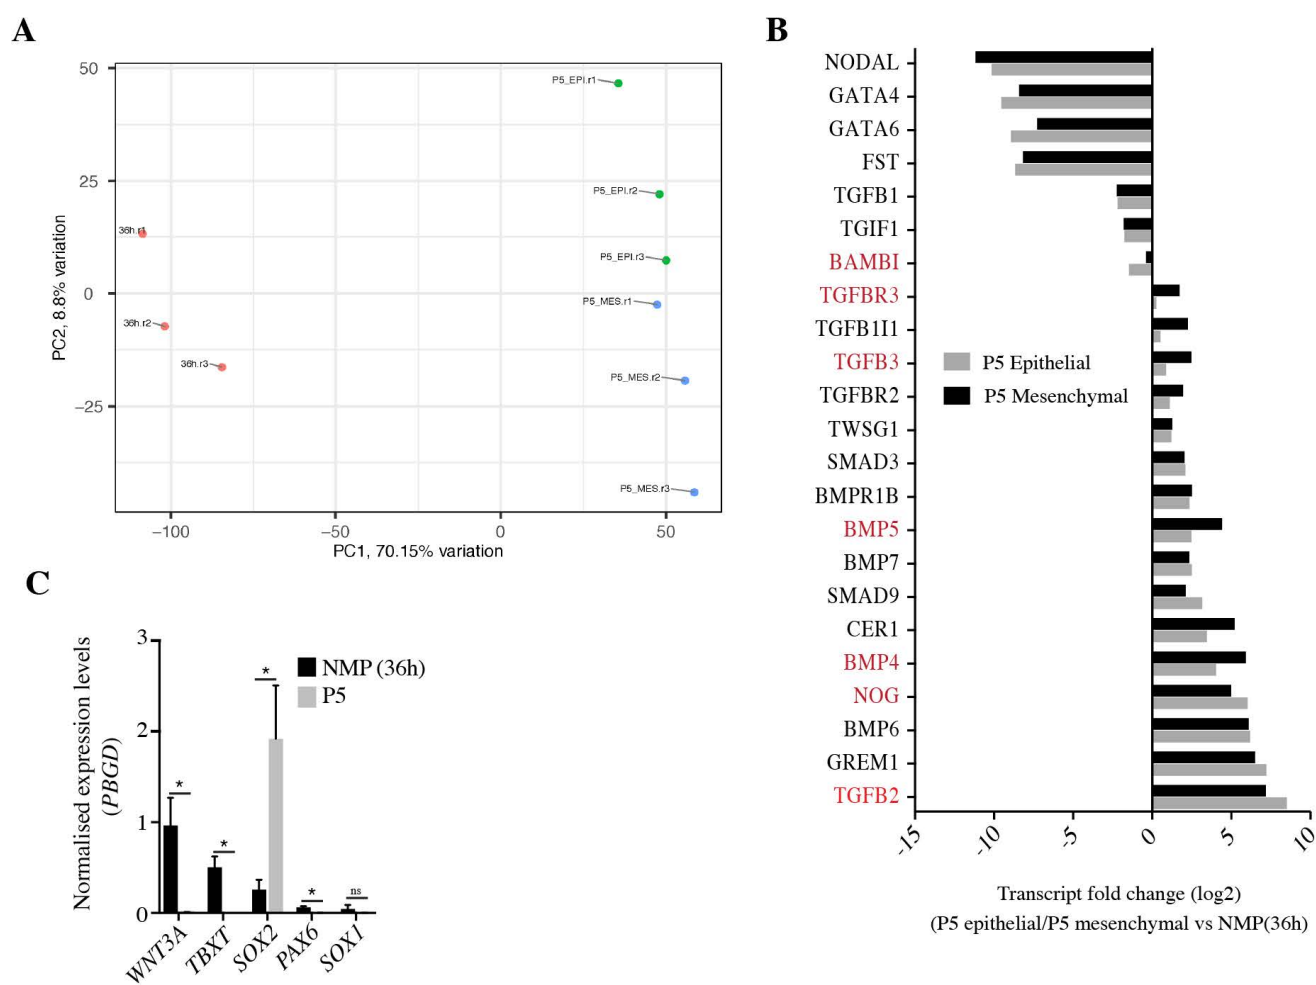

1106 **Figure 4 – figure supplement 1: Principle component analysis of mesenchymal and epithelial**  
 1107 **samples analysed by bulk RNA-sequencing.**

1108 A) PCA analysis showing biological replicates for the mesenchymal (MES) and epithelial (EPI) enriched  
 1109 samples and NMP samples (36h). B) Graph showing transcriptional fold change (FC) of selected TGF  
 1110 superfamily genes in P5 epithelial and P5 mesenchymal samples over 36h samples. Genes which are  
 1111 statistically differentially expressed between epithelial and mesenchymal samples are highlighted in  
 1112 red. C) Transcript levels of *WNT3A*, *TBXT*, *SOX2*, *PAX6* and *SOX1* in NMP (36h) and P5 samples as  
 1113 measured by RT-qPCR. Expression levels were normalised to the reference gene *PBGD*. Error bars  
 1114 show SEM (n=2/3 experiments), \*P < 0.05 (unpaired t-test).

1115

1116

1117

1118



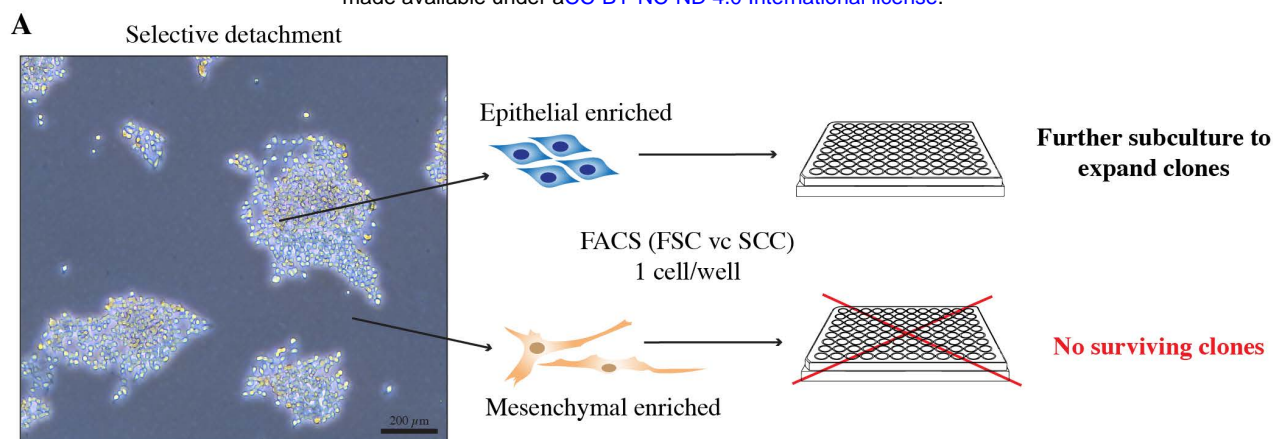

1119 **Figure 6 – figure supplement 1: Generating sub-clonal populations from PNP/NC cell enriched**  
1120 **samples**

1121 A) Scheme to generate sub-clonal populations from mesenchymal- or epithelial- enriched samples.  
1122 Cells were selectively detached to separate epithelial from mesenchymal cell populations and single  
1123 cells from each enriched cell sample were sorted (FACS) into wells of a 96 well plate. Surviving sub-  
1124 clones were expanded for analysis.

1125

1126

1127

1128

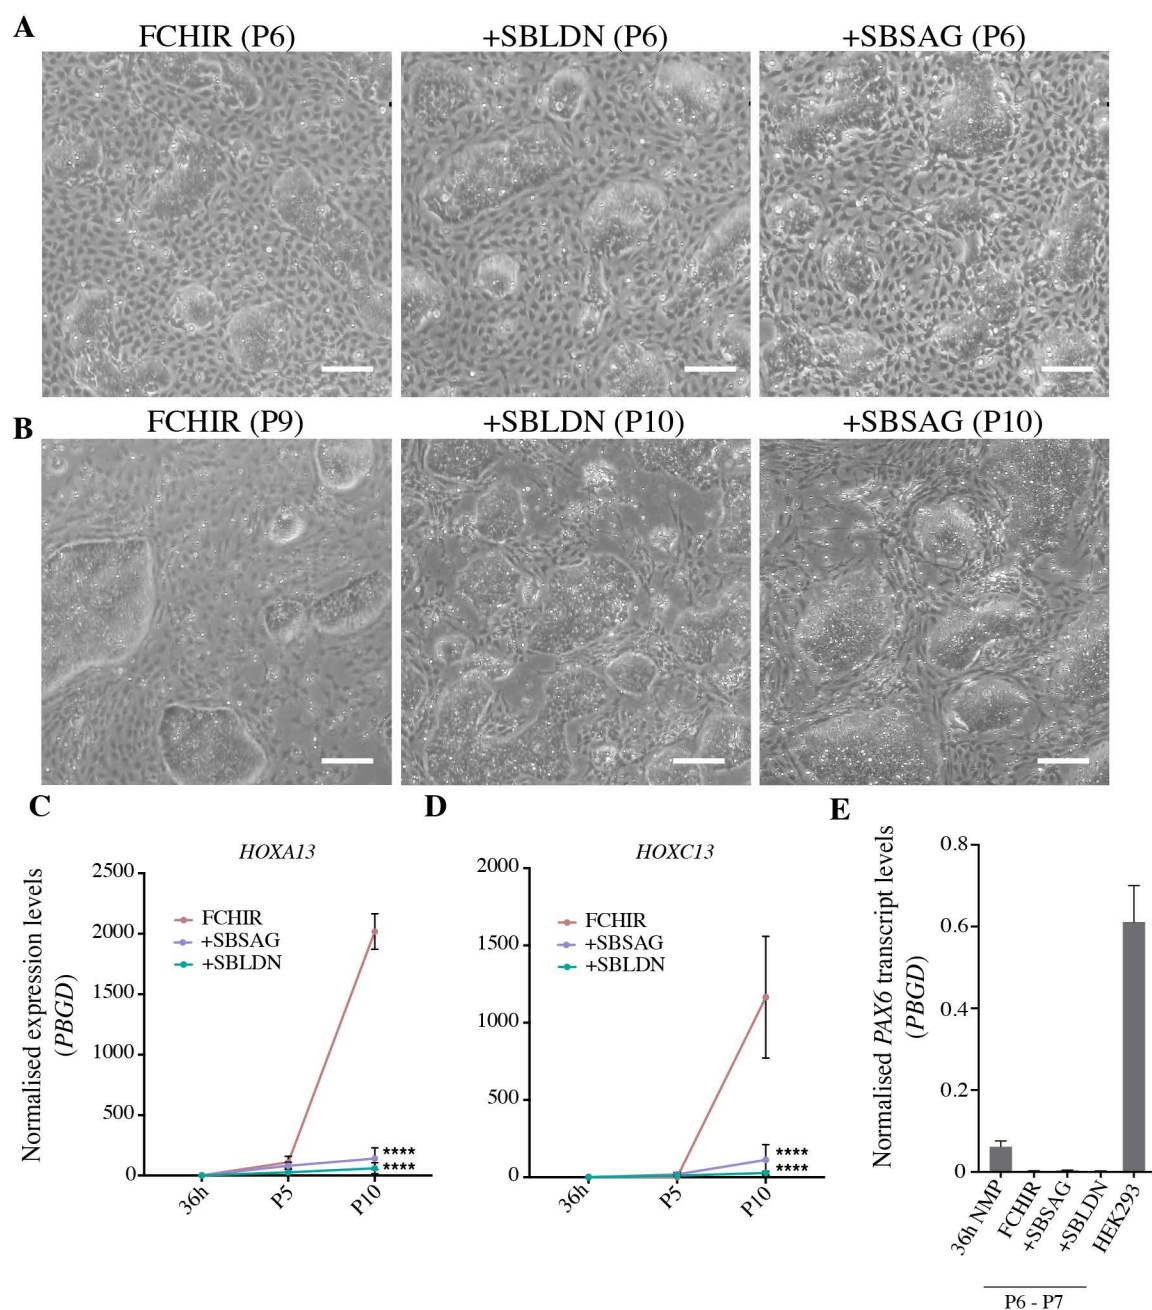

1129 **Figure 7 – figure supplement 1: Upregulation of terminal *HOX* genes is significantly delayed, and**  
 1130 **neural marker gene *PAX6* remains silent, in +SBSAG and +SBLDN conditions**

1131 A, B) Graphs showing the transcriptional quantification (RT-qPCR) of *HOXA13* (A) and *HOXC13* (B) at  
 1132 early and late passages in all conditions tested as indicated in Figure 7A. Expression levels are  
 1133 presented as fold change over the 36h time point and were normalised to the reference gene *PBGD*.  
 1134 Error bars show mean with SEM (n = 3). \*\*\*\*P<0.0001, \*\*\*<0.0002 (two-way ANOVA). C)  
 1135 Quantification of *PAX6* transcript levels under various conditions as indicated in Figure 7A, and in  
 1136 comparison to HEK293 (positive control) cells. Expression levels were normalised to reference gene  
 1137 *PBGD*. Error bars show mean with SEM (n = 2-3).  
 1138
